# Supplementary material for: Triphenylbismuth carbonate-mediated oxidation of hydroxylamines to nitrones and in situ 1,3-dipolar cycloaddition
Source: Royal Society of Chemistry journal article supplement (doi:10.1039/c6ra18578a), 2016-01-01

**Triphenylbismuth carbonate-mediated oxidation of hydroxylamines to nitrones and *in situ***

**1,3-dipolar cycloaddition**

Dinh-Vu Nguyen, Praveen Prakash, Edmond Gravel and Eric Doris

|                                                                  |    |
|------------------------------------------------------------------|----|
| <b>1. General</b>                                                | S2 |
| <b>2. Gram-scale synthesis of compound 2a</b>                    | S2 |
| <b>3. Gram-scale synthesis of compound 3a</b>                    | S2 |
| <b>4. Analytical data</b>                                        | S3 |
| <b>5. References</b>                                             | S6 |
| <b>6. Copies of <sup>1</sup>H and <sup>13</sup>C NMR Spectra</b> | S7 |

## 1. General

Reactions were carried out using dry solvents. TLC was performed on silica gel plates visualized either with a UV lamp (254 nm/365 nm), or using solutions of phosphomolybdic acid in EtOH or  $\text{KMnO}_4\text{-K}_2\text{CO}_3$  in water followed by heating. Flash chromatography was performed on Kieselgel 60 (230–240 mesh, Merck). NMR spectra were recorded on a Bruker AVANCE DPX 400 spectrometer.  $^1\text{H}$  NMR spectra were recorded at 400 MHz and data are reported as follows: chemical shift in ppm from tetramethylsilane as internal standard, multiplicity: s = singlet, d = doublet, t = triplet, q = quartet, quint = quintuplet, m = multiplet), coupling constant ( $J$ ) in Hz, integration.  $^{13}\text{C}$  NMR spectra were recorded at 100 MHz and data are reported as follows: chemical shift in ppm from tetramethylsilane with the deuterated solvent signal(s) used for calibration, multiplicity with respect to proton (deduced from DEPT experiments, s = quaternary carbon (C), d = CH, t =  $\text{CH}_2$ , q =  $\text{CH}_3$ ). Mass spectra were recorded using a Waters Micromass ZQ 2000 ESI spectrometer. IR-spectra were recorded using a Perkin-Elmer 2000 FT-IR. Wavenumbers are given in  $\text{cm}^{-1}$  at their maximum intensity.

## 2. Gram-scale synthesis of compound 2a.

At room temperature, to a solution of *N,N*-dibenzyl hydroxylamine **1a** (1.02 g, 4.78 mmol, 1 equiv.) in  $\text{CH}_2\text{Cl}_2$  (50 mL) was added portionwise  $\text{Ph}_3\text{BiCO}_3$  (2.63 g, 1.1 equiv.). The white slurry was stirred at room temperature for 2 h. The mixture was then filtered over a pad of celite, rinsed with  $\text{CH}_2\text{Cl}_2$ , and the solvent was evaporated under vacuum. The crude product was purified by flash chromatography over silica (Pentane/EtOAc, 1:0 to 1:1) to afford 0.98 g of compound **2a** (97%, white solid).

## 3. Gram-scale synthesis of compound 3a.

At room temperature, to a solution of *N,N*-dibenzyl hydroxylamine **1a** (1 g, 4.68 mmol, 1 equiv.) and benzannulated cyclooctyne **4** (0.96 g, 1 equiv.) in  $\text{CH}_2\text{Cl}_2$  (70 mL) was added portionwise  $\text{Ph}_3\text{BiCO}_3$  (2.57 g, 1.1 equiv.). The white slurry was stirred at room temperature for 2 h. The mixture was then filtered over a pad of celite, rinsed with  $\text{CH}_2\text{Cl}_2$ , and the solvent was evaporated under vacuum. The crude product was purified by flash chromatography over silica (Pentane/EtOAc, 1:0 to 9:1) to afford 1.47 g of compound **3a** (76%, white solid).

#### 4. Analytical data

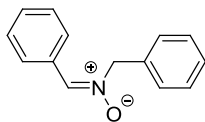

**Compound 2a.**<sup>1</sup> Flash chromatography (Pentane/EtOAc, from 1:0 to 1:1). <sup>1</sup>H NMR (CDCl<sub>3</sub>) δ 8.23-8.18 (m, 2H), 7.52-7.26 (m, 9H), 5.06 (s, 2H) ppm. <sup>13</sup>C NMR (CDCl<sub>3</sub>) δ 134.2 (d), 133.1 (s), 130.4 (d), 130.3 (d), 129.2 (d), 128.9 (d), 128.5 (d), 128.4 (d), 71.1 (t) ppm. IR (neat) 1580, 1457, 1147, 903, 724 cm<sup>-1</sup>. MS (ES<sup>+</sup>): 212 [M+H]<sup>+</sup>.

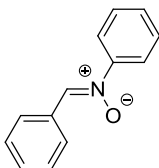

**Compound 2b.**<sup>2</sup> Flash chromatography (Pentane/EtOAc, from 1:0 to 8:2). <sup>1</sup>H NMR (CDCl<sub>3</sub>) δ 8.41-8.39 (m, 2H), 7.92 (s, 1H), 7.79-7.77 (m, 2H), 7.51-7.46 (m, 6H) ppm. <sup>13</sup>C NMR (CDCl<sub>3</sub>) δ 149.0 (s), 134.5 (d), 130.9 (s), 129.9 (d), 129.1 (d), 128.9 (d), 128.6 (d), 121.7 (d) ppm. IR (neat) 1549, 1484, 1444, 1065, 919, 764 cm<sup>-1</sup>. MS (ES<sup>+</sup>): 198 [M+H]<sup>+</sup>.

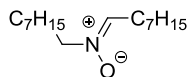

**Compound 2c.**<sup>3</sup> Flash chromatography (CH<sub>2</sub>Cl<sub>2</sub>/MeOH from 1:0 to 98:2). <sup>1</sup>H NMR (CDCl<sub>3</sub>) δ 6.64 (t, *J* = 5.8 Hz, 1H), 3.73 (t, *J* = 7.0 Hz, 2H), 2.48 (q, *J* = 6.8 Hz, 2H), 1.89 (qt, *J* = 7.2 Hz, 2H), 1.51 (qt, *J* = 7.2 Hz, 2H), 1.35-1.24 (m, 18H), 0.87 (t, *J* = 6.7 Hz, 1H) ppm. <sup>13</sup>C NMR (CDCl<sub>3</sub>) δ 139.2 (d), 65.3 (t), 31.6 (t, x2), 29.3 (t), 29.0 (t, x2), 28.9 (t), 27.3 (t), 26.5 (t), 26.4 (t), 25.5 (t), 22.5 (t), 14.0 (q) ppm. IR (neat) 1600, 1463, 904, 724 cm<sup>-1</sup>. MS (ES<sup>+</sup>): 256 [M+H]<sup>+</sup>.

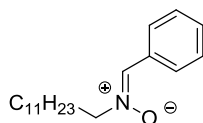

**Compound 2d.**<sup>1</sup> Compound **2d** was isolated from compound **2d'** by flash chromatography (Pentane/EtOAc, from 1:0 to 7:3 to 0:1, then CH<sub>2</sub>Cl<sub>2</sub>/MeOH 95:5). <sup>1</sup>H NMR (CDCl<sub>3</sub>) δ 8.25-8.23 (m, 2H), 7.45-7.41 (m, 3H), 7.37 (s, 1H), 3.92 (t, *J* = 7.14 Hz, 2H), 2.00 (quint, *J* = 7.5 Hz, 2H), 1.40-1.24 (m, 18H), 0.87 (t, *J* = 6.39 Hz, 3H) ppm. <sup>13</sup>C NMR (CDCl<sub>3</sub>) δ 134.1 (s), 130.4 (s), 130.2 (d), 128.4 (d), 121.7 (d), 67.3 (t), 31.8 (t), 29.5 (t), 29.4 (t), 29.3 (t), 29.2 (t), 29.1 (t), 27.7 (t), 26.4 (t), 22.6 (t), 14.0 (q) ppm. IR (neat) 1457, 1153, 903, 724 cm<sup>-1</sup>. MS (ES<sup>+</sup>): 290 [M+H]<sup>+</sup>.

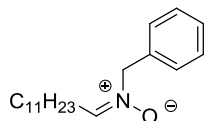

**Compound 2d'.**<sup>1</sup> <sup>1</sup>H NMR (CDCl<sub>3</sub>) δ 7.40-7.33 (m, 5H), 6.62 (t, *J* = 5.6 Hz, 1H), 4.84 (s, 2H), 2.45 (dd, *J* = 13.8, 6.94 Hz, 2H), 1.48-1.40 (m, 2H), 1.31-1.19 (m, 16H), 0.87 (t, *J* = 6.44 Hz, 3H). <sup>13</sup>C NMR (CDCl<sub>3</sub>) δ 137.5 (s), 130.4 (d), 129.3 (d), 128.9 (d), 128.2 (d), 85.8 (t), 31.8 (t), 29.6 (t), 29.5 (t), 29.4 (t), 29.2 (t), 22.6 (t), 14.0 (q) ppm. IR (neat) 1777, 1456, 1214, 908, 750 cm<sup>-1</sup>. MS (ES<sup>+</sup>): 290 [M+H]<sup>+</sup>.

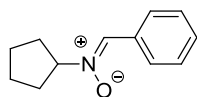

**Compound 2e.** Flash chromatography (Pentane/EtOAc, from 1:0 to 8:2).  $^1\text{H}$  NMR ( $\text{CDCl}_3$ )  $\delta$  8.24-8.22 (m, 2H), 7.49 (s, 1H), 7.43-7.37 (m, 3H), 4.48-4.41 (m, 1H), 2.33-2.24 (m, 2H), 2.05-1.90 (m, 4H), 1.70-1.60 (m, 2H) ppm.  $^{13}\text{C}$  NMR ( $\text{CDCl}_3$ )  $\delta$  132.8 (d), 130.6 (s), 130.0 (d), 128.4 (d, x2), 76.3 (d), 31.4 (t), 25.5 (t) ppm. IR (neat) 1572, 1451, 1328, 140, 903, 726, 695  $\text{cm}^{-1}$ . MS ( $\text{ES}^+$ ): 190  $[\text{M}+\text{H}]^+$ . HRMS calcd for  $\text{C}_{12}\text{H}_{16}\text{NO}$   $[\text{M}+\text{H}]^+$  190.1232, found 190.1244.

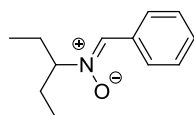

**Compound 2f.** Flash chromatography (Pentane/EtOAc, from 1:0 to 7:3).  $^1\text{H}$  NMR ( $\text{CDCl}_3$ )  $\delta$  8.29-8.26 (m, 2H), 7.49-7.37 (m, 4H), 3.61-3.55 (m, 1H), 2.12-2.00 (m, 2H), 1.67-1.57 (m, 2H), 0.93 (td,  $J = 7.5, 1.4$ , Hz, 6H) ppm.  $^{13}\text{C}$  NMR ( $\text{CDCl}_3$ )  $\delta$  134.0 (d), 130.3 (s), 130.0 (d), 128.5 (d), 128.4 (d), 80.7 (d), 25.9 (t), 10.7 (q) ppm. IR (neat) 1572, 1455, 1337, 1150  $\text{cm}^{-1}$ . MS ( $\text{ES}^+$ ): 192  $[\text{M}+\text{H}]^+$ . HRMS calcd for  $\text{C}_{12}\text{H}_{18}\text{NO}$   $[\text{M}+\text{H}]^+$  192.1388, found 192.1401.

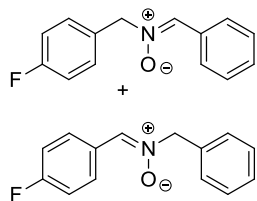

**Compounds 2g and 2g'.** Flash chromatography (Pentane/EtOAc, from 1:0 to 6:4), 1:1 ratio of **2g** and **2g'**.  $^1\text{H}$  NMR ( $\text{CDCl}_3$ )  $\delta$  8.27-8.18 (m, 4H), 7.47-7.32 (m, 11H), 7.12-7.04 (m, 3H), 5.02 (s, 2H), 4.99 (s, 1.4 H) ppm.  $^{13}\text{C}$  NMR ( $\text{CDCl}_3$ )  $\delta$  163.3 (s,  $^1J_{\text{C-F}} = 253$  Hz), 163.0 (s,  $^1J_{\text{C-F}} = 253$  Hz), 137.4 (d), 137.0 (d), 134.4 (d), 133.3 (d), 132.8 (s), 131.6 (d), 131.1 (d,  $^3J_{\text{C-F}} = 9$  Hz), 130.9 (d,  $^3J_{\text{C-F}} = 9$  Hz), 130.6 (d), 130.4 (d), 130.1 (s), 126.6 (s,  $^4J_{\text{C-F}} = 3$  Hz), 115.8 (d,  $^2J_{\text{C-F}} = 21$  Hz), 115.5 (d,  $^2J_{\text{C-F}} = 21$  Hz), 71.0 (t), 70.2 (t) ppm. IR (neat) 1597, 1503, 1231, 1147, 846, 703  $\text{cm}^{-1}$ . MS ( $\text{ES}^+$ ): 230  $[\text{M}+\text{H}]^+$ . HRMS calcd for  $\text{C}_{14}\text{H}_{13}\text{FNO}$   $[\text{M}+\text{H}]^+$  230.0981, found 230.0965.

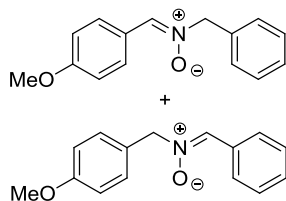

**Compounds 2h and 2h'.** Flash chromatography (Pentane/EtOAc, 1:0 to 6:4), 1:1 ratio of **2h** and **2h'**.  $^1\text{H}$  NMR ( $\text{CDCl}_3$ )  $\delta$  8.22-8.18 (m, 4H), 7.47 (dd,  $J = 7.9, 2.0$  Hz, 2H), 7.43-7.37 (m, 7H), 7.32 (d,  $J = 8.7$  Hz, 2H), 6.95-6.89 (m, 4H), 5.04 (d,  $J = 14.0$  Hz, 2H), 4.97 (d,  $J = 14.0$  Hz, 2H), 3.83 (s, 3H), 3.82 (s, 3H) ppm.  $^{13}\text{C}$  NMR ( $\text{CDCl}_3$ )  $\delta$  161.0 (s), 160.0 (s), 133.9 (d), 133.97(d), 133.3 (s), 130.8 (d), 130.5 (d), 130.3 (d), 129.1 (d), 128.9 (d), 128.8 (d), 128.5 (d), 128.3 (d), 125.1 (s), 123.3 (s), 114.3 (d), 113.7 (d), 70.6 (t, x2), 55.2 (q) ppm. IR (neat) 1611, 1513, 1303, 1250, 1176, 1030, 903, 724  $\text{cm}^{-1}$ . MS ( $\text{ES}^+$ ): 242  $[\text{M}+\text{H}]^+$ . HRMS calcd for  $\text{C}_{15}\text{H}_{16}\text{NO}_2$   $[\text{M}+\text{H}]^+$  242.1181, found 242.1171.

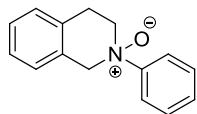

**Compound 2i.**<sup>4</sup> Flash chromatography (CH<sub>2</sub>Cl<sub>2</sub>/MeOH, from 1:0 96:4, silica deactivated with aqueous NH<sub>4</sub>OH). <sup>1</sup>H NMR (CDCl<sub>3</sub>) δ 7.97 (dd, *J* = 7.3, 1.6 Hz, 2H), 7.49-7.38 (m, 3H), 7.30-7.22 (m, 3H), 7.06 (dd, *J* = 7.9, 1.6 Hz, 1H), 5.06 (d, *J* = 15.5 Hz, 1H), 4.60 (d, *J* = 15.5 Hz, 1H), 4.17-4.11 (m, 1H), 3.79-3.66 (m, 2H), 2.84 (dt, *J* = 16.4, 5.0 Hz, 1H) ppm. <sup>13</sup>C NMR (CDCl<sub>3</sub>) δ 131.1 (s), 129.9 (s), 129.1 (d), 129.0 (d), 128.5 (d), 127.5 (d), 126.7 (d), 126.2 (d), 120.5 (d), 71.3 (t), 65.5 (t), 26.2 (t) ppm. IR (neat) 1489, 903, 726 cm<sup>-1</sup>. MS (ES<sup>+</sup>): 226 [M+H]<sup>+</sup>.

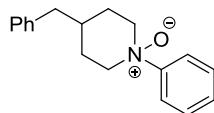

**Compound 2j.** Could not be purified by chromatography, NMR provided for the crude. <sup>1</sup>H NMR (CDCl<sub>3</sub>) δ 7.86 (d, *J* = 8.0 Hz, 2H), 7.48 (t, *J* = 7.8 Hz, 2H), 7.31-7.21 (m, 4H), 7.14 (d, *J* = 8.0 Hz, 2H), 4.07 (t, *J* = 11.0 Hz, 2H), 3.35-3.30 (m, 2H), 2.67 (d, *J* = 8.4 Hz, 2H), 2.56-2.47 (m, 2H), 2.15 (m, 1H), 1.50-1.43 (m, 2H) ppm. MS (ES<sup>+</sup>): 268 [M+H]<sup>+</sup>. HRMS calcd for C<sub>18</sub>H<sub>22</sub>NO [M+H]<sup>+</sup> 268.1701, found 268.1699.

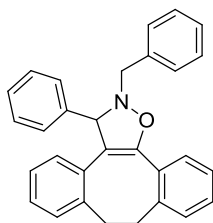

**Compound 3a.**<sup>5</sup> Flash chromatography (Pentane/EtOAc from 1:0 to 9:1). <sup>1</sup>H NMR (CDCl<sub>3</sub>) δ 7.53-7.50 (m, 3H), 7.39-7.35 (m, 2H), 7.33-7.23 (m, 7H), 7.18-7.11 (m, 4H), 7.09 (td, *J* = 7.5, 1.5 Hz, 1H), 7.03 (td, *J* = 7.5, 1.5 Hz, 1H), 6.97 (dd, *J* = 7.5, 1.5 Hz, 1H), 5.24 (s, 1H), 4.65 (d, *J* = 13.0 Hz, 1H), 4.31 (d, *J* = 13.0 Hz, 1H), 3.43-3.35 (m, 1H), 3.22-3.15 (m, 1H), 3.12-3.05 (m, 1H), 2.97-2.90 (m, 1H) ppm. <sup>13</sup>C NMR (CDCl<sub>3</sub>) δ 147.8 (s), 141.3 (s), 140.9 (s), 138.9 (s), 136.1 (s), 132.4 (s), 130.9 (s), 129.9 (d), 129.6 (d), 129.3 (d), 128.5 (d), 128.4 (d, x2), 127.8 (d), 127.6 (d), 127.4 (d), 126.9 (d), 126.8 (d), 125.6 (d), 125.4 (d), 110.3 (s), 63.0 (s), 36.8 (t), 32.9 (t) ppm. IR (neat) 1502, 1382, 872, 735 cm<sup>-1</sup>. MS (ES<sup>+</sup>): 416 [M+H]<sup>+</sup>.

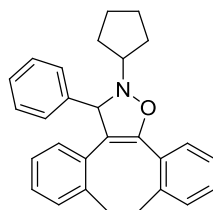

**Compound 3e.** Flash chromatography (eluent Pentane/EtOAc from 1:0 to 94:6). <sup>1</sup>H NMR (CDCl<sub>3</sub>) δ 7.42 (dd, *J* = 6.9, 1.8 Hz, 2H), 7.30 (t, *J* = 7.7 Hz, 2H), 7.27-7.22 (m, 1H), 7.17-7.13 (m, 4H), 7.08 (dd, *J* = 7.3, 1.6 Hz, 1H), 7.05 (dd, *J* = 3.3, 1.7 Hz, 1H), 7.01 (dd, *J* = 7.3, 1.7 Hz, 1H), 6.97 (dd, *J* = 7.6, 1.9 Hz, 1H), 5.26 (s, 1H), 3.83 (quint, *J* = 6.6 Hz, 1H), 3.45-3.38 (m, 1H), 3.23-3.09 (m, 2H), 3.02-2.95 (m, 1H), 2.16-2.03 (m, 2H), 1.97-1.74 (m, 4H), 1.70-1.61 (m, 2H) ppm. <sup>13</sup>C NMR (CDCl<sub>3</sub>) δ 147.6 (s), 142.1 (s), 140.9 (s), 138.8 (s), 132.6 (s), 130.9 (d), 129.9 (d), 129.5 (d), 128.5 (d), 128.4 (d), 127.7 (d), 127.3 (d), 126.9 (d), 126.7 (d), 125.6 (d), 125.4 (d), 110.2 (s), 77.7 (d), 68.0 (d), 36.9 (t), 33.0 (t), 31.2 (t), 30.3 (t), 24.8 (t), 24.7 (t) ppm. IR (neat) 1674, 1493, 1451, 1029, 905, 729 cm<sup>-1</sup>. MS (ES<sup>+</sup>): 394 [M+H]<sup>+</sup>. HRMS calcd for C<sub>28</sub>H<sub>28</sub>NO [M+H]<sup>+</sup> 394.2171, found 394.2183.

## 5. References

- 1) C. Matassini, C. Parmeggiani, F. Cardona, A. Goti, *Org. Lett.* 2015, **17**, 4082.
- 2) D. A. Evans, H. -J. Song, K. R. Fandrick, *Org. Lett.* 2006, **8**, 3351.
- 3) C. Gella, E. Ferrer, R. Alibés, F. Busqué, P. March, M. Figueredo, J. Font, *J. Org. Chem.* 2009, **74**, 6365.
- 4) H. Ueda, K. Yoshida, H. Tokuyama, *Org. Lett.* 2014, **16**, 4194.
- 5) C. S. McKay, J. Moran, J. P. Pezacki, *Chem. Commun.* 2010, **46**, 931.

6. Copies of  $^1\text{H}$  and  $^{13}\text{C}$  NMR Spectra

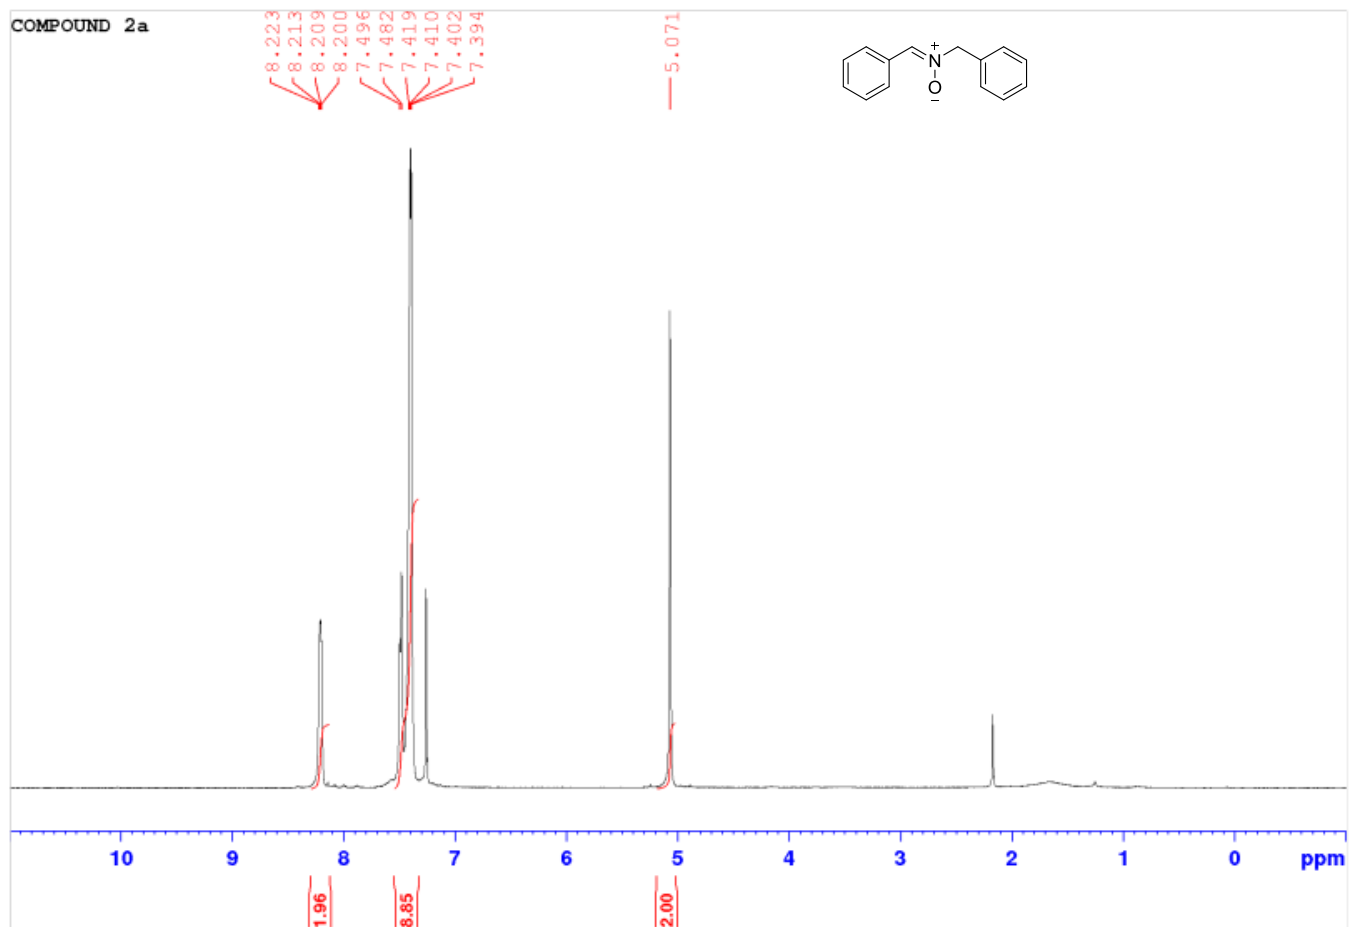

COMPOUND 2a

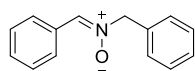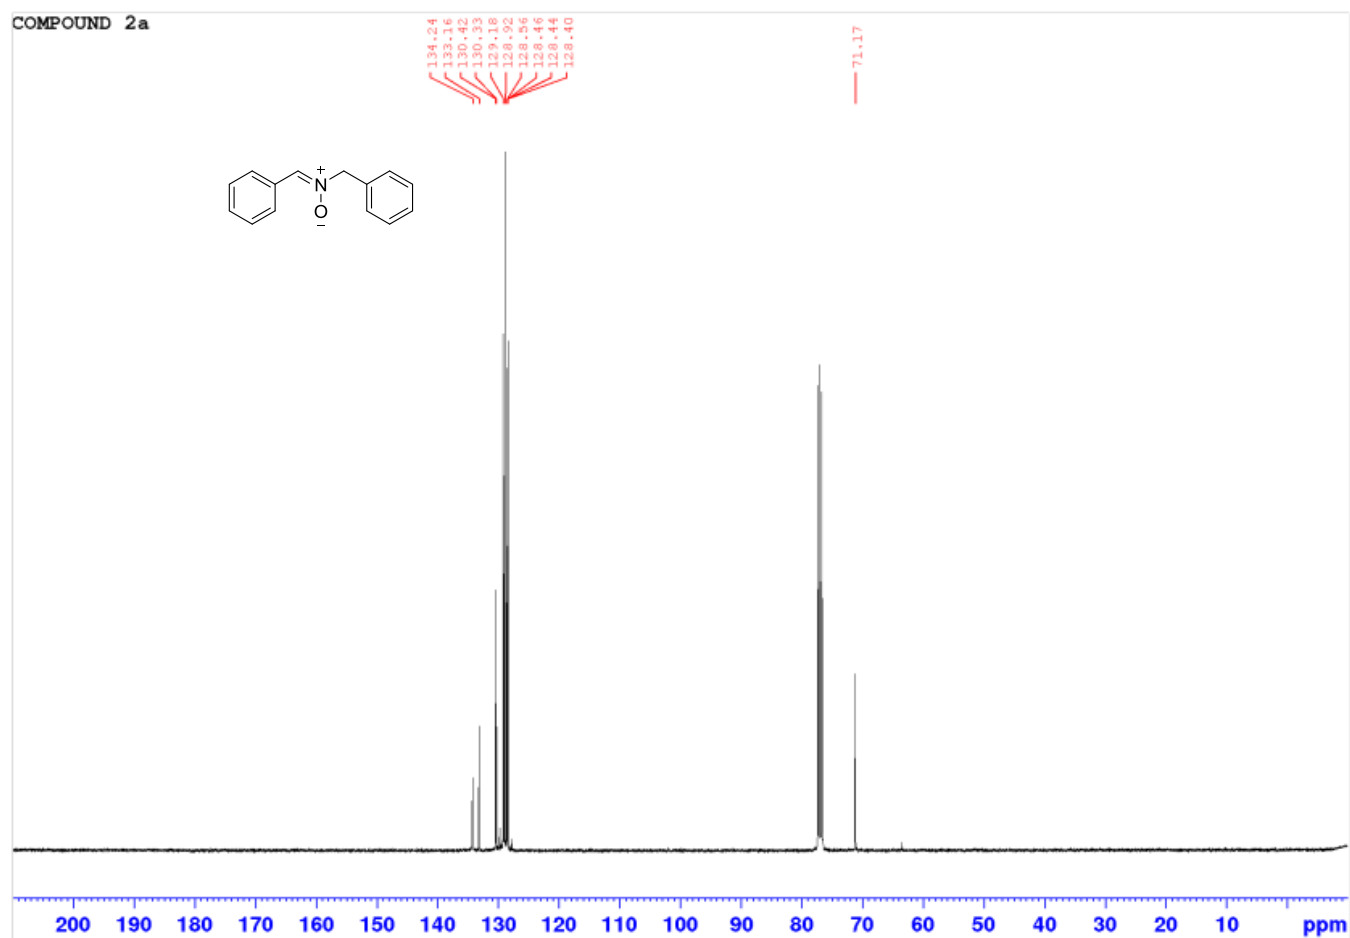



COMPOUND 2b

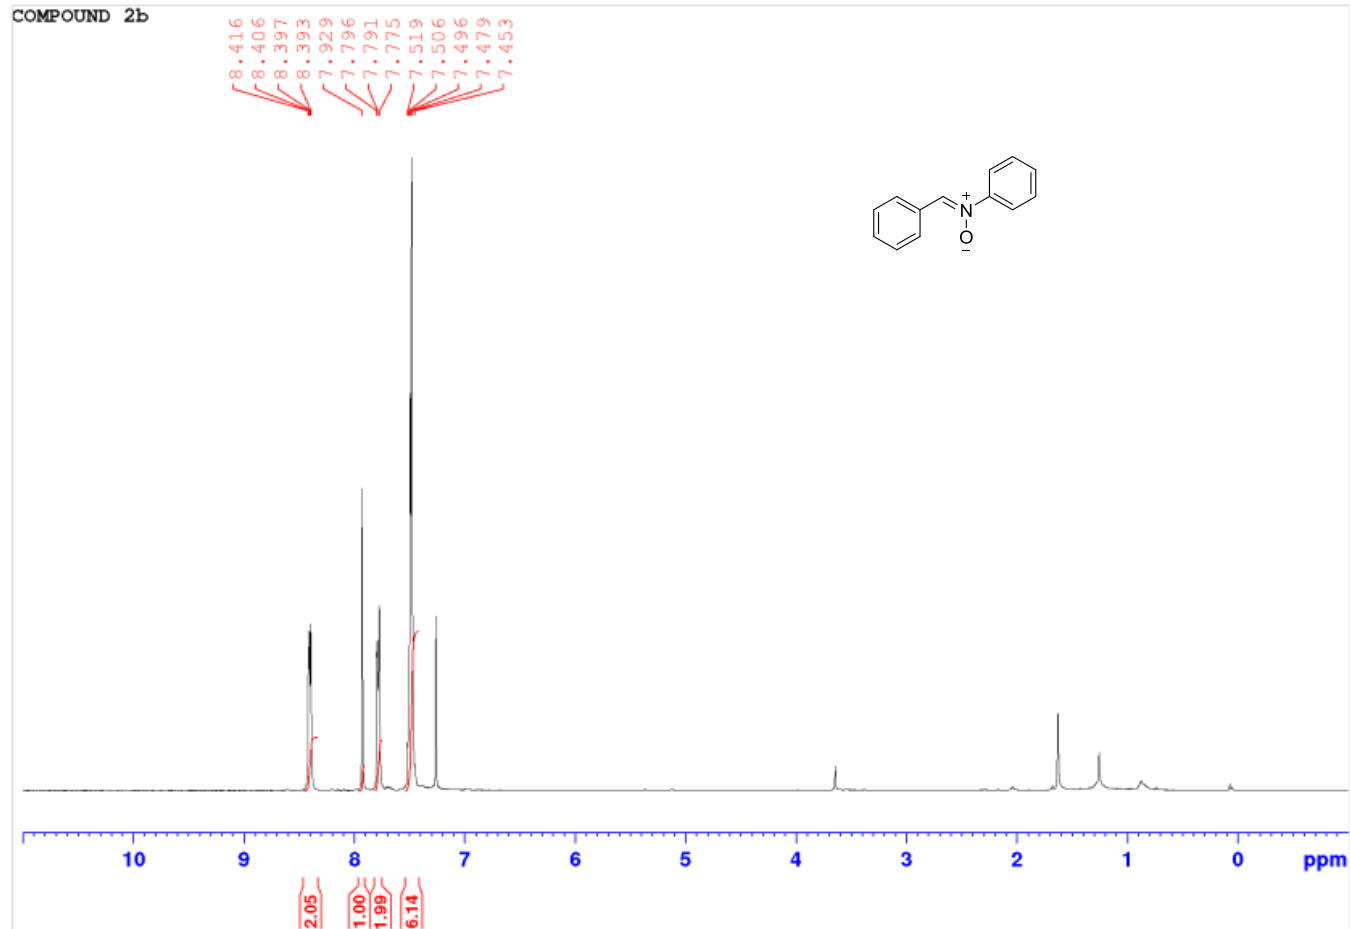

COMPOUND 2b

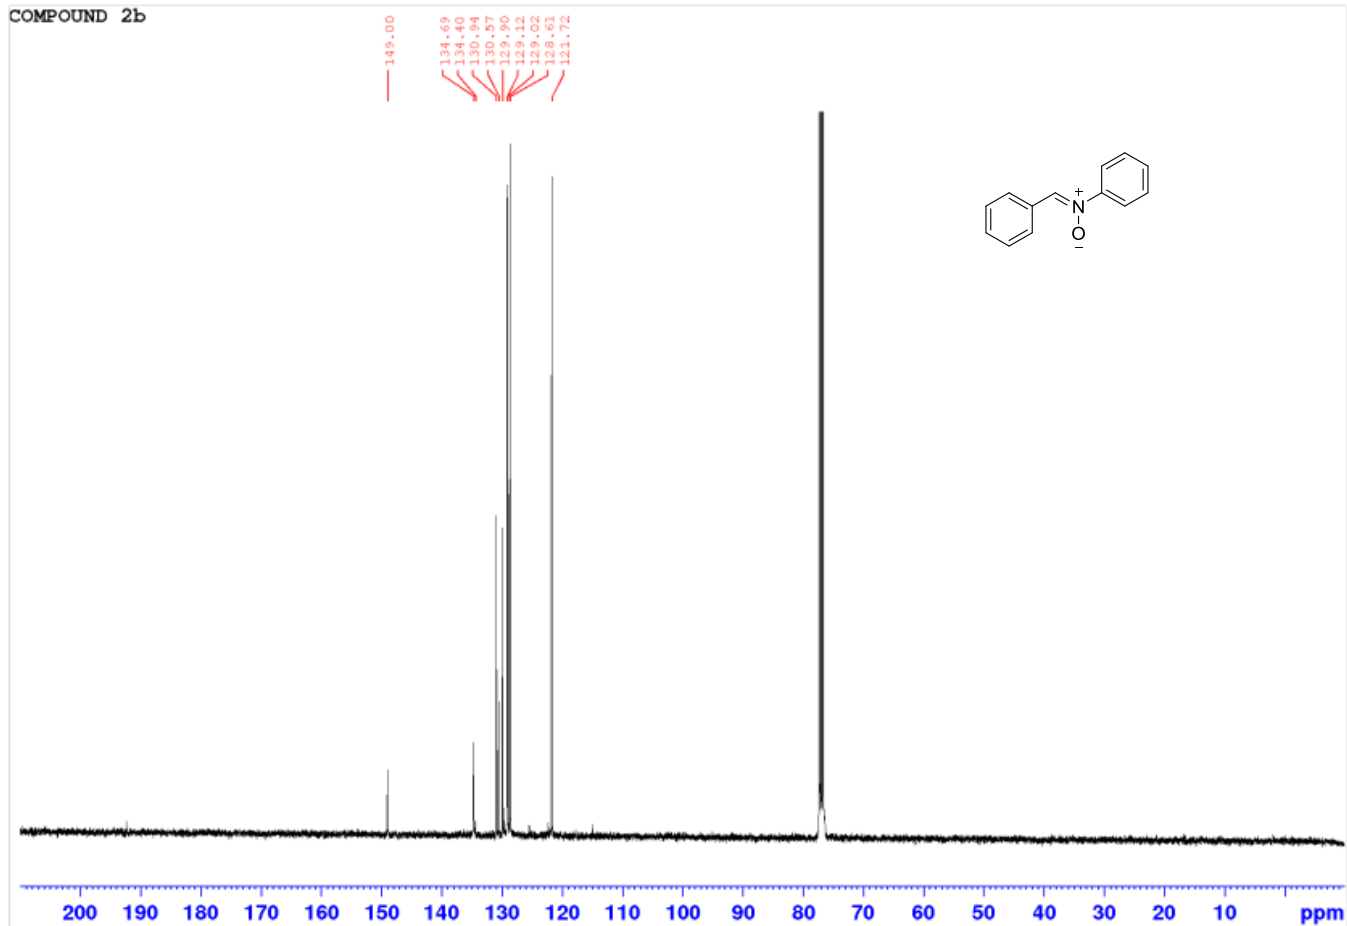

COMPOUND 2c

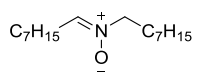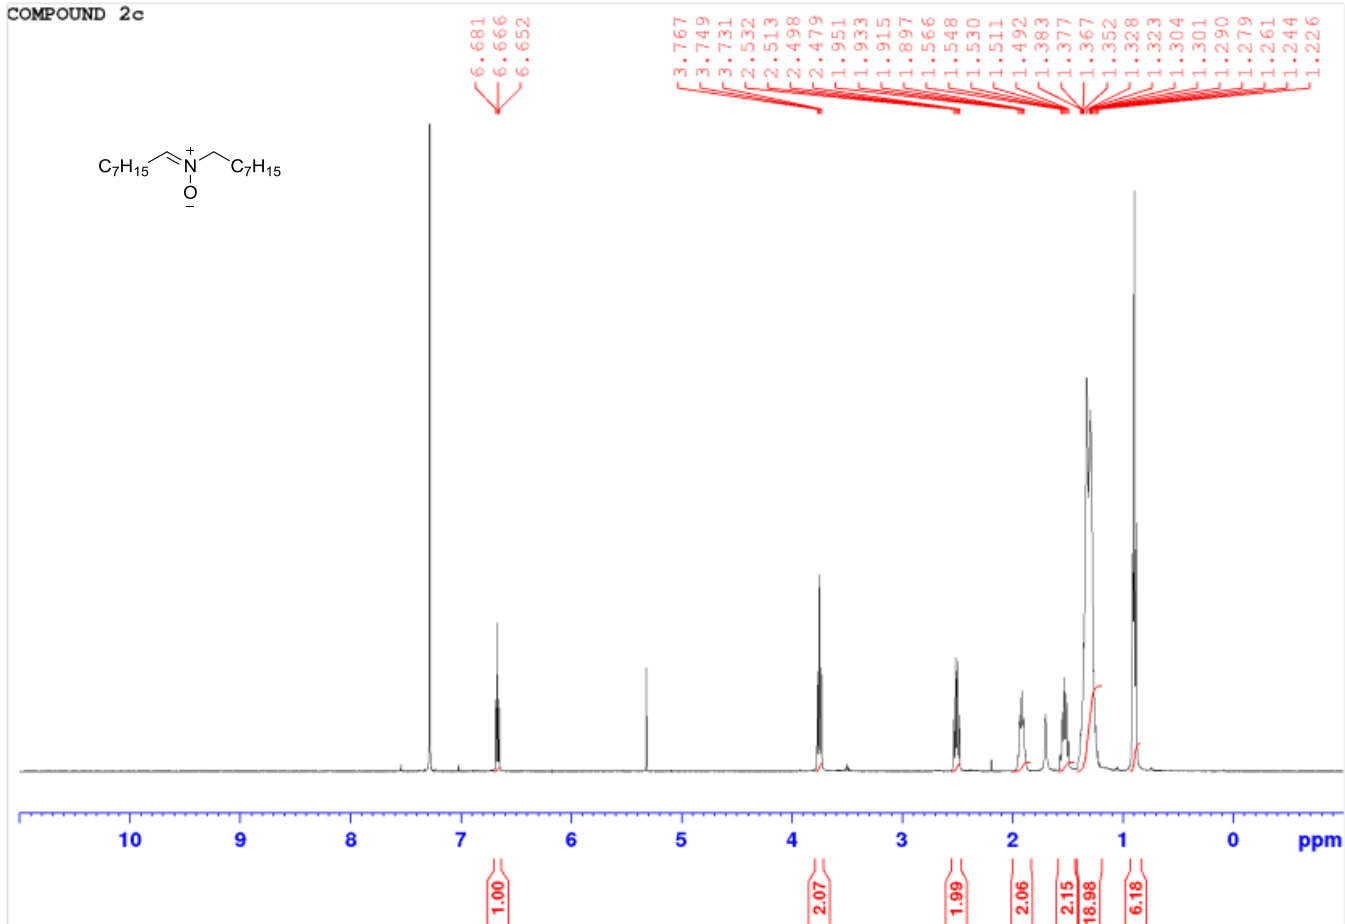

COMPOUND 2c

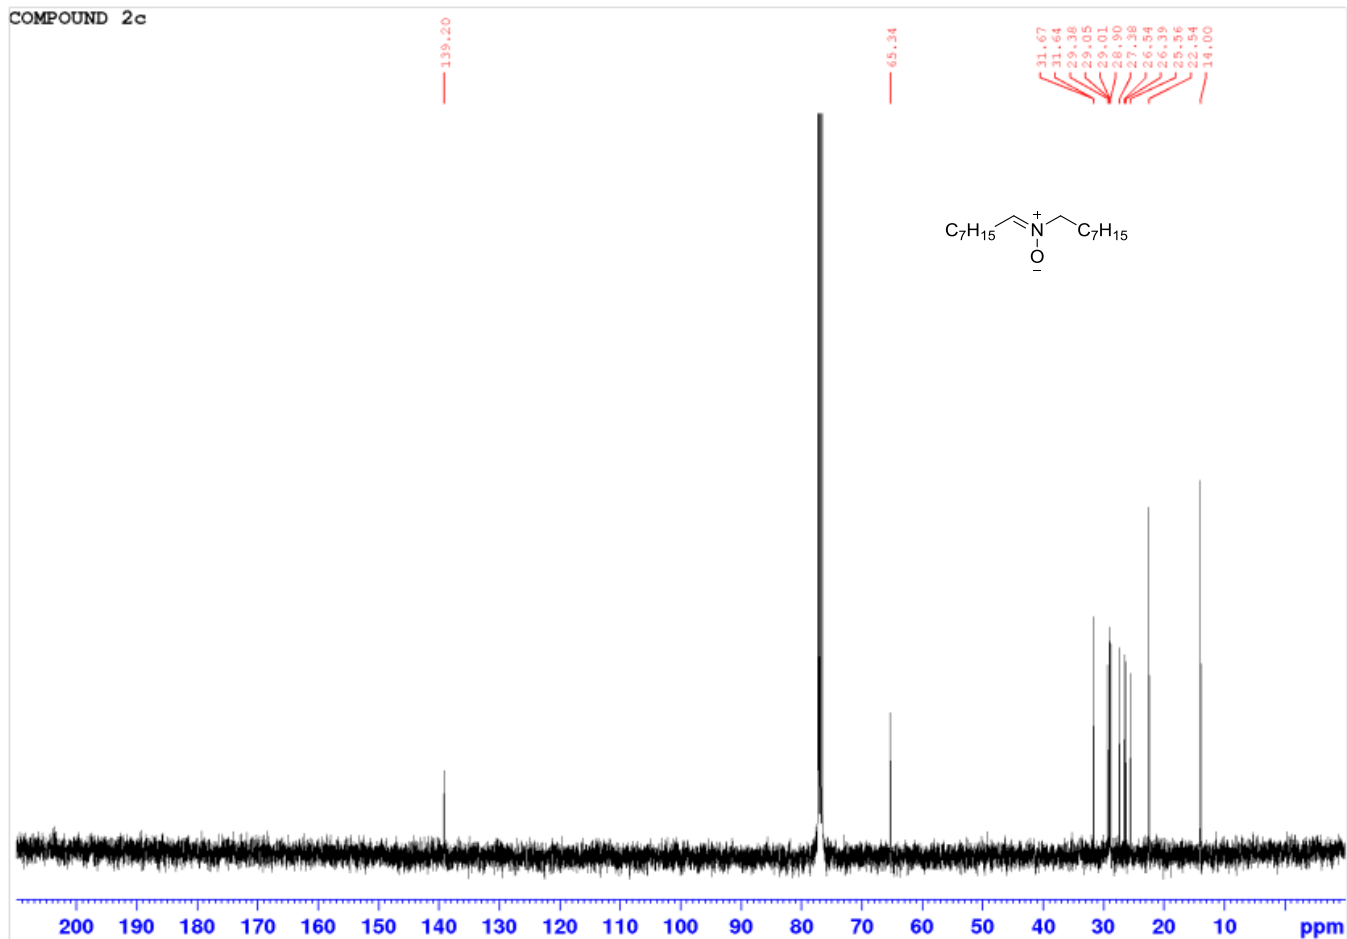

COMPOUND 2d

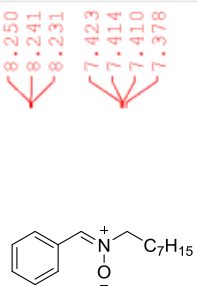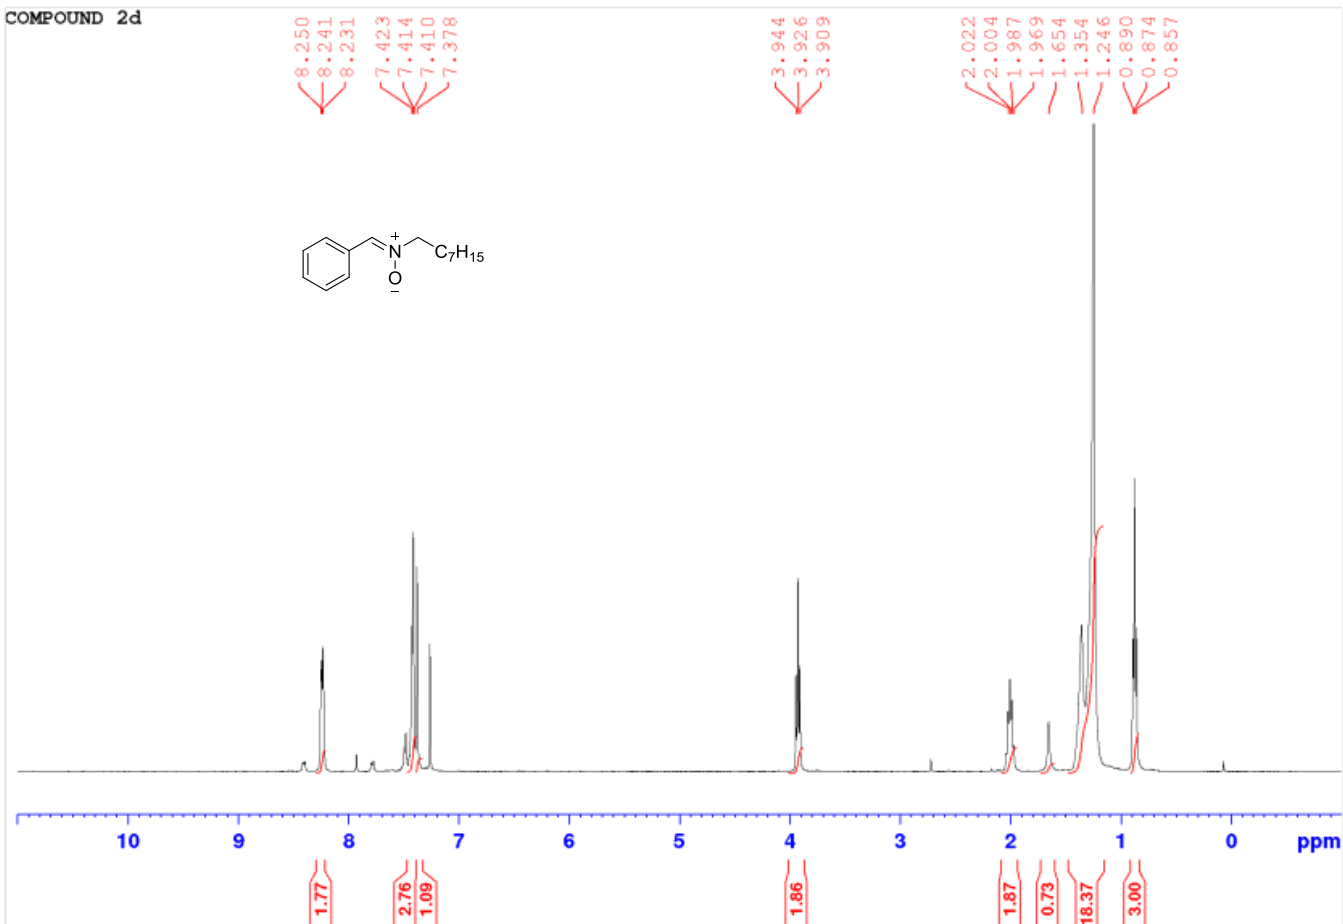

COMPOUND 2d

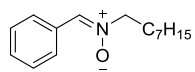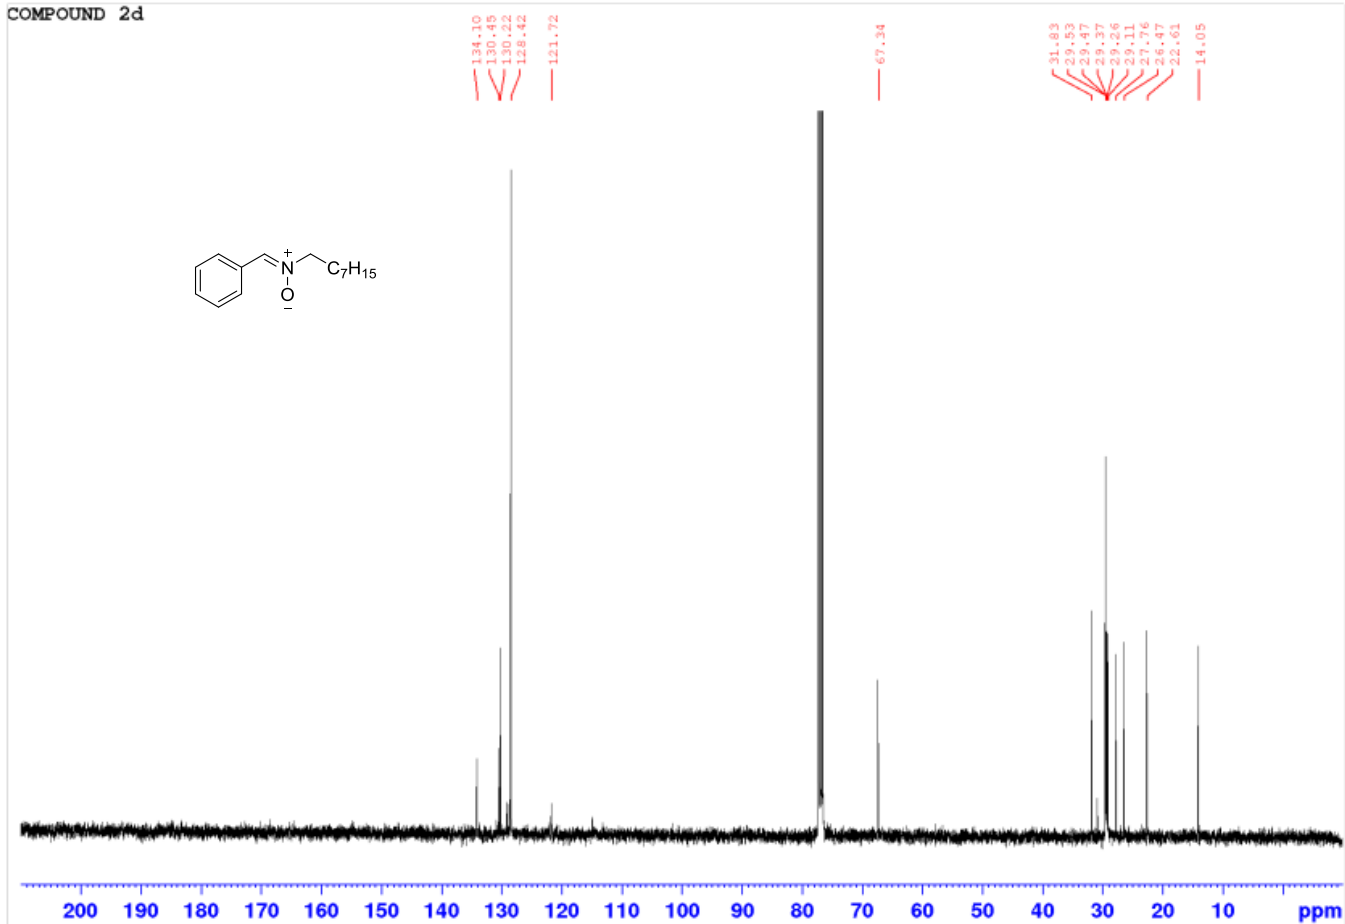

COMPOUND 2d'

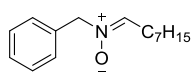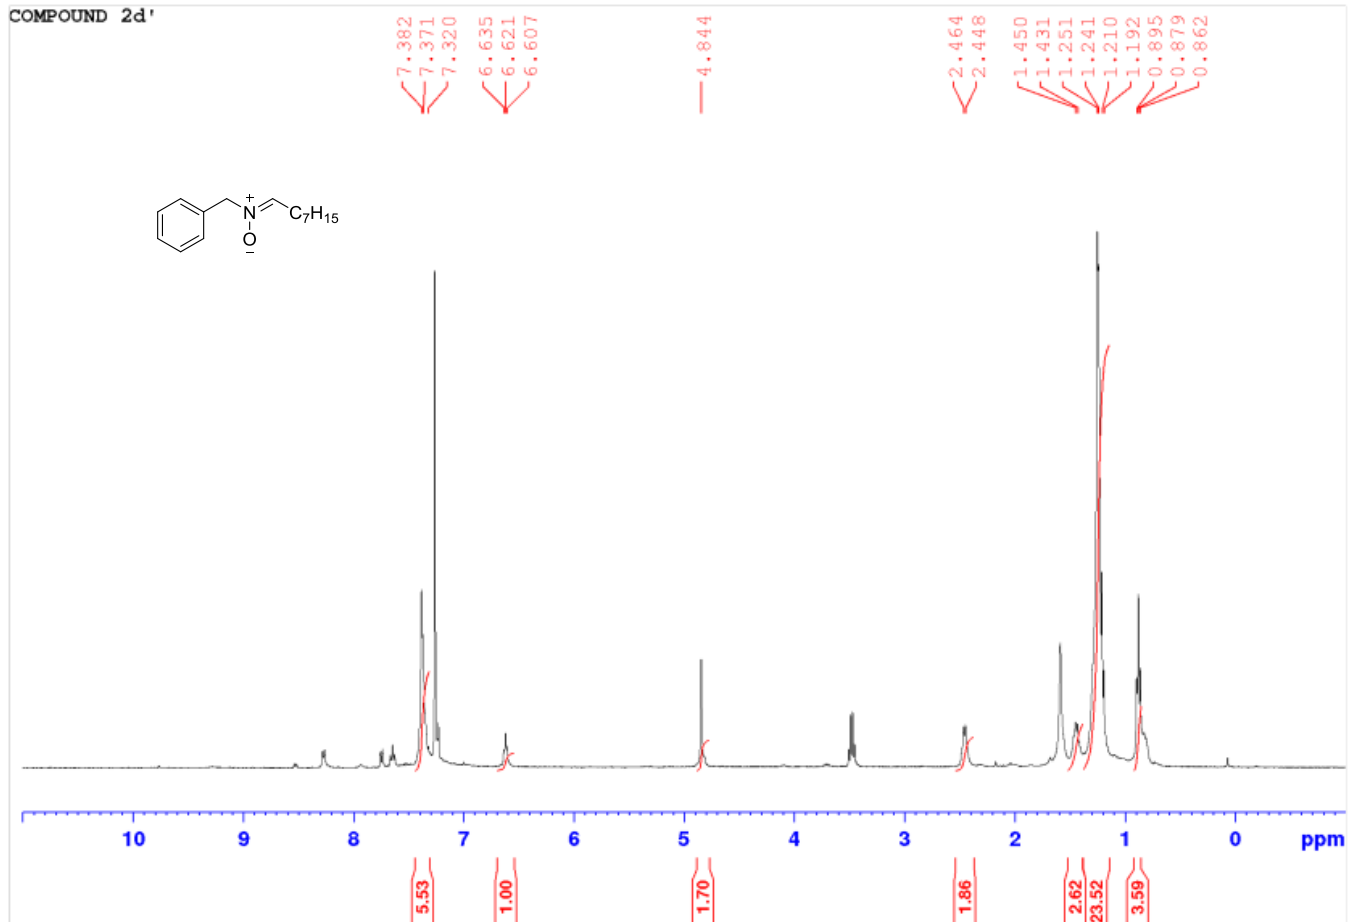

COMPOUND 2d'

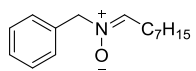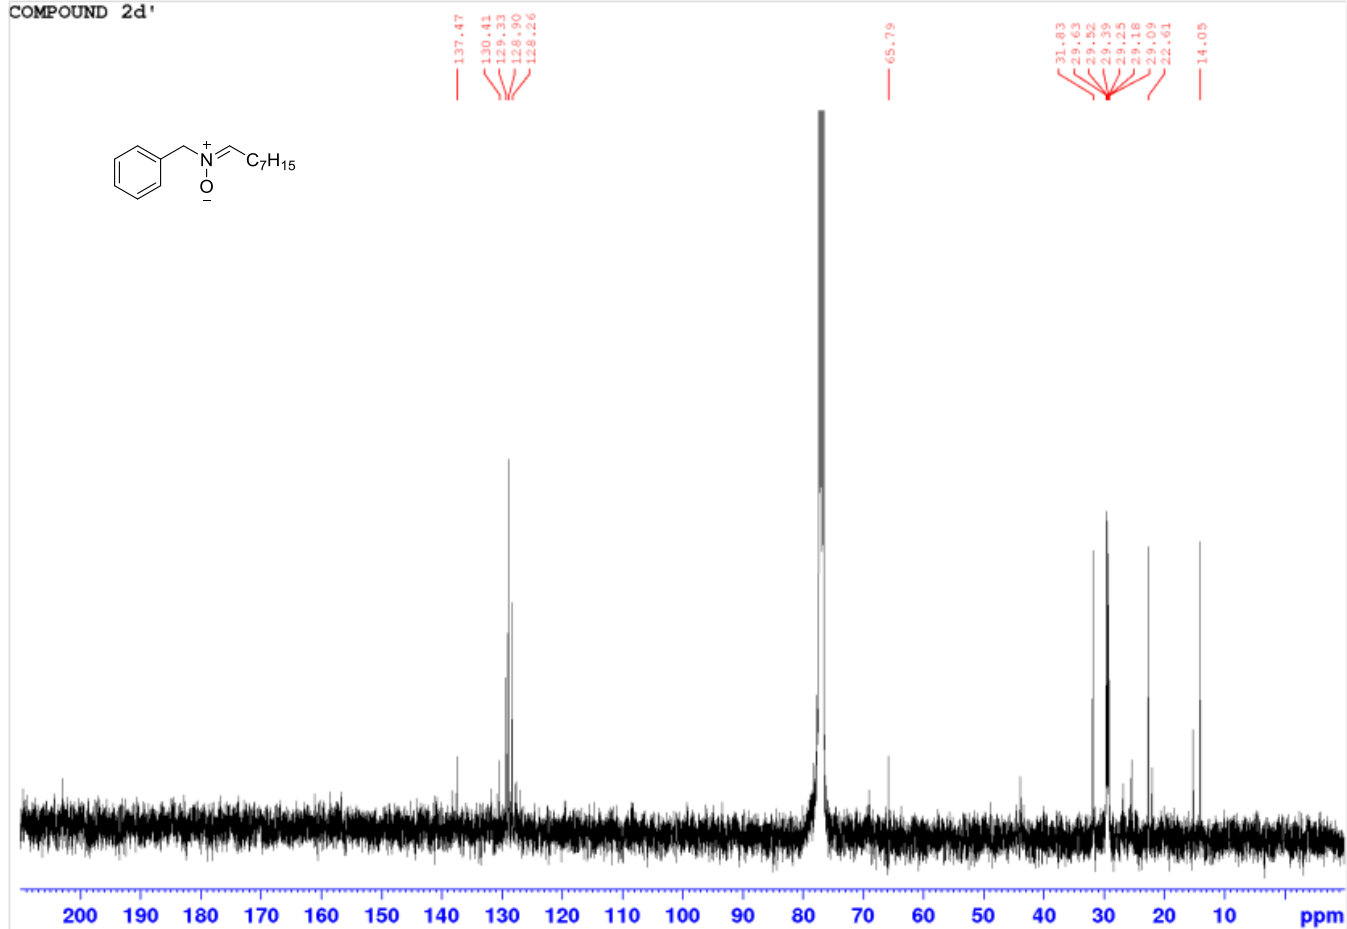



COMPOUND 2e

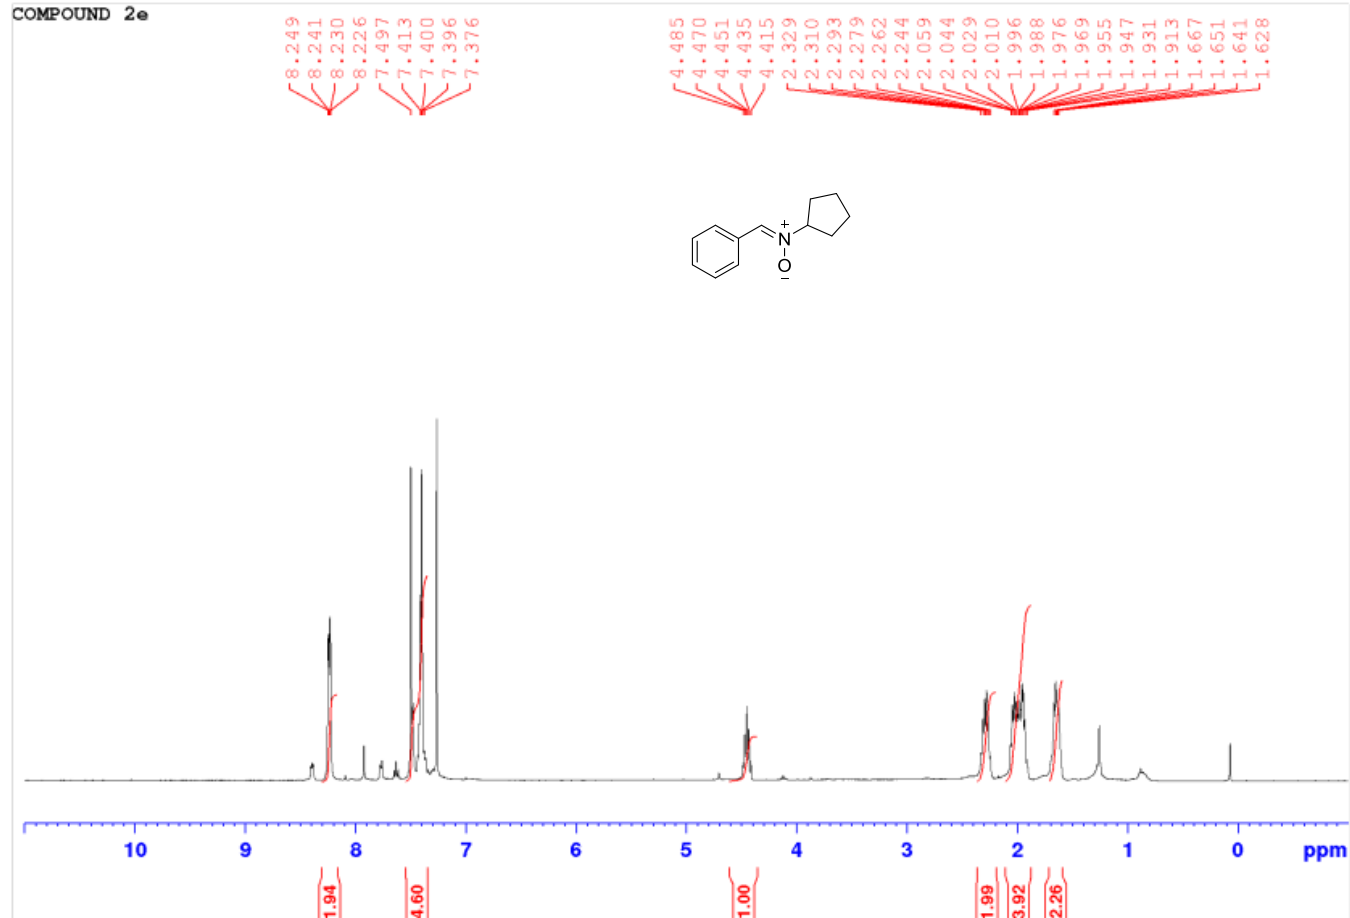

COMPOUND 2e

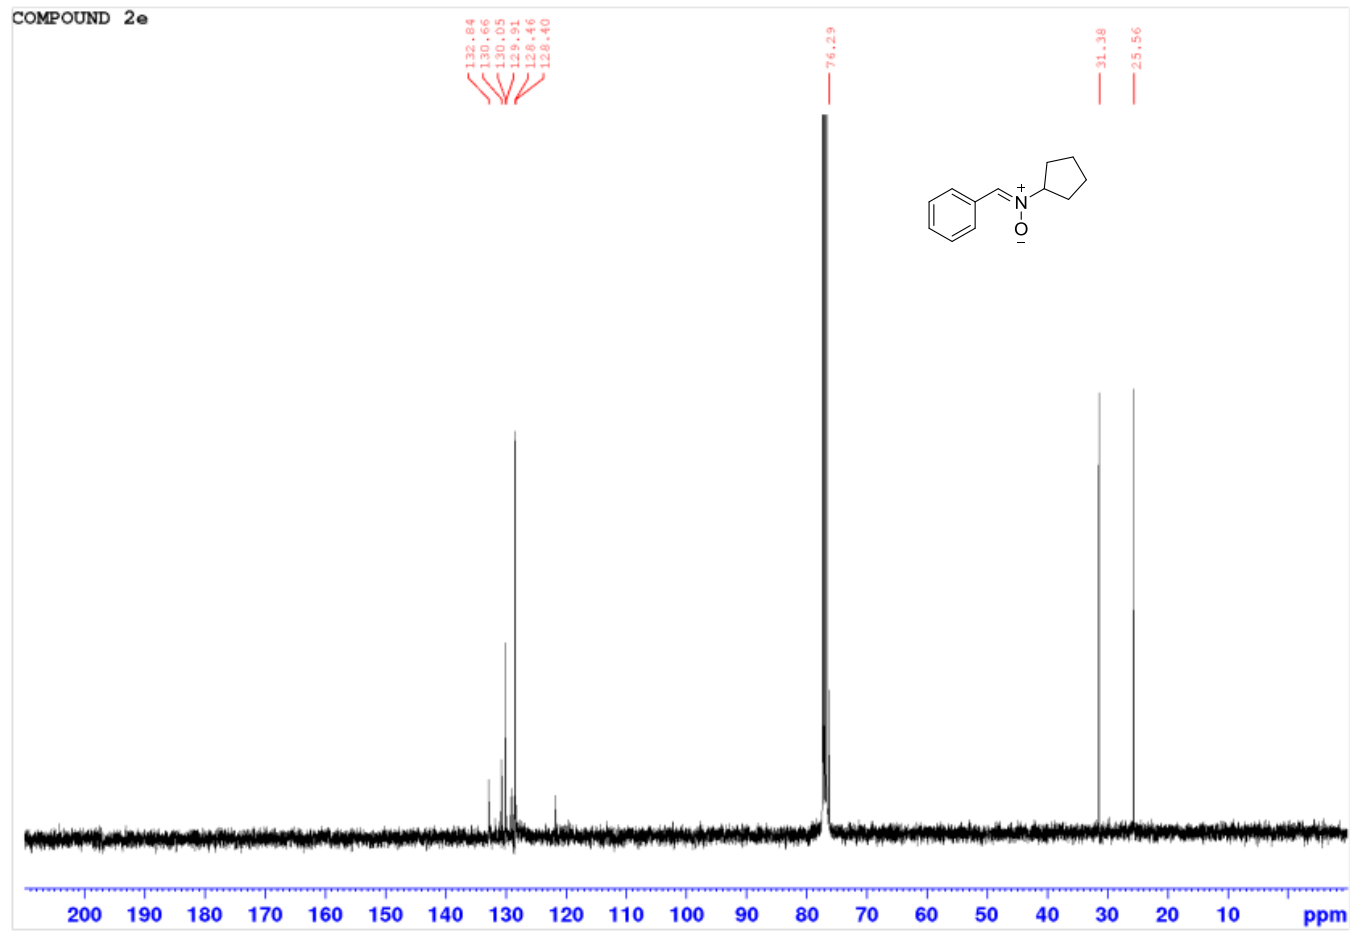

COMPOUND 2f

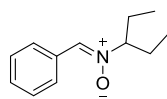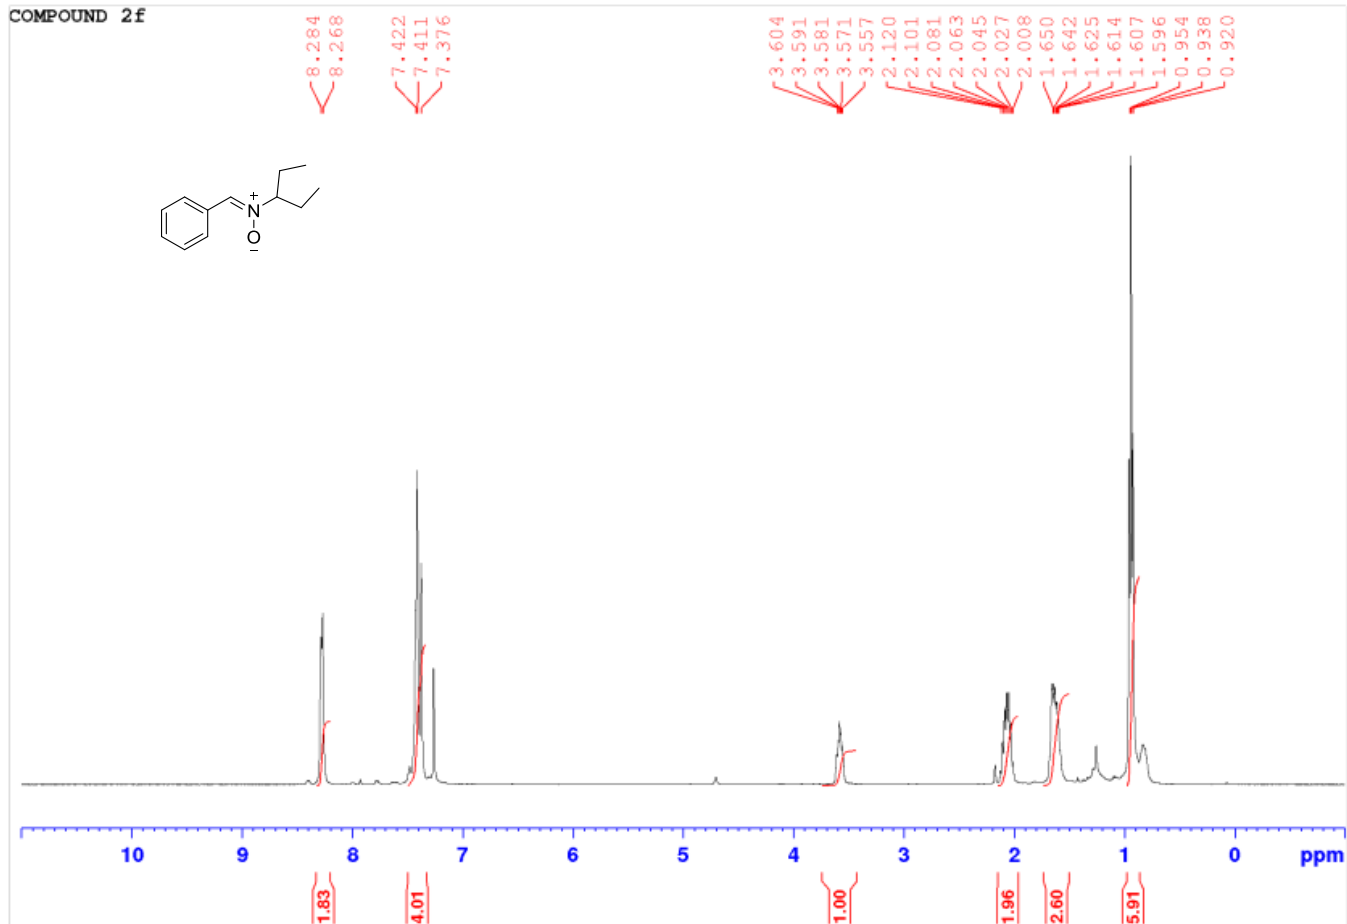

COMPOUND 2f

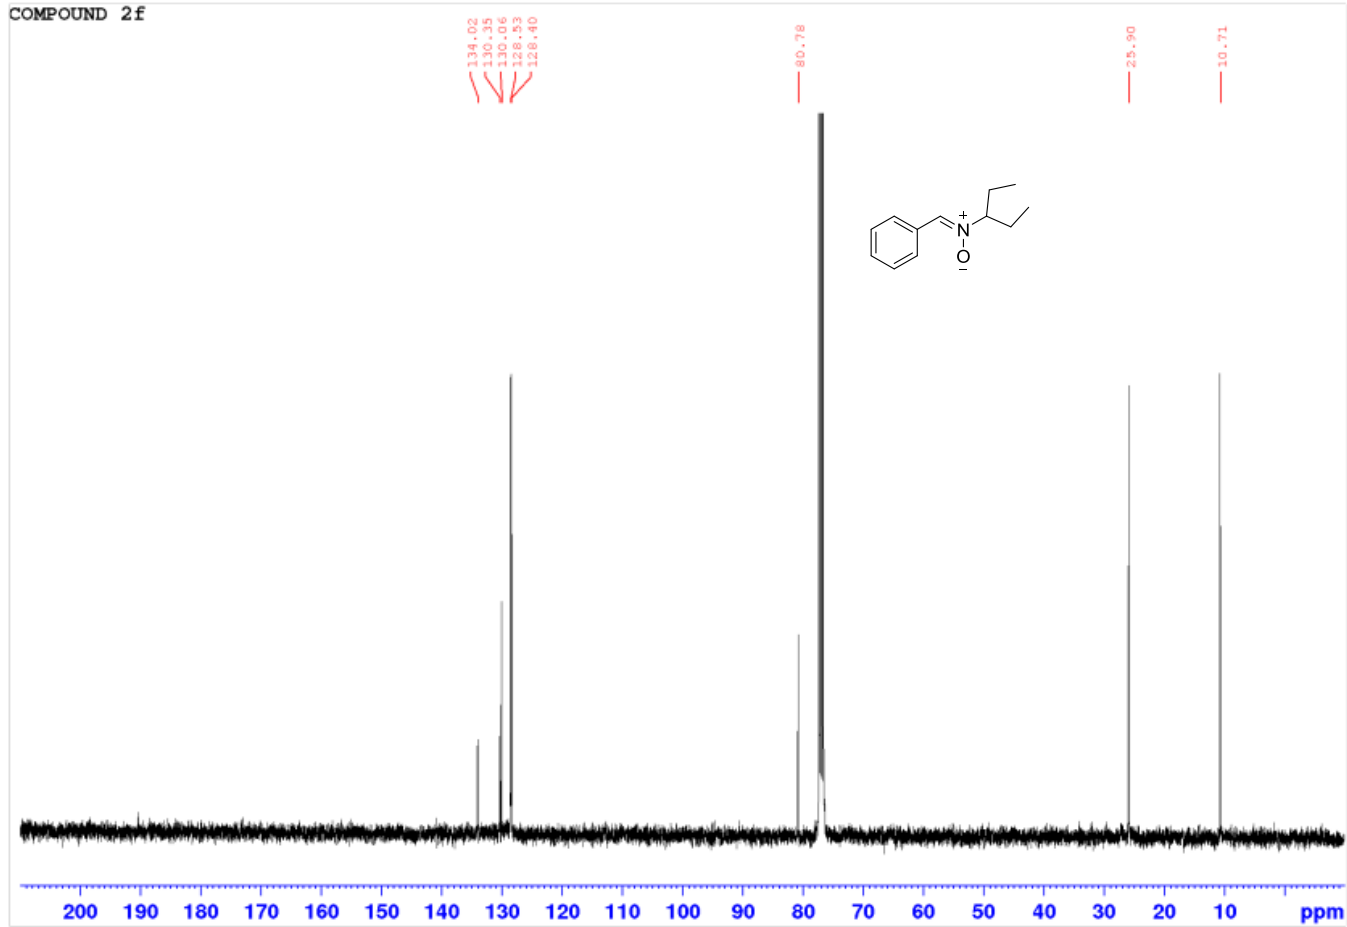

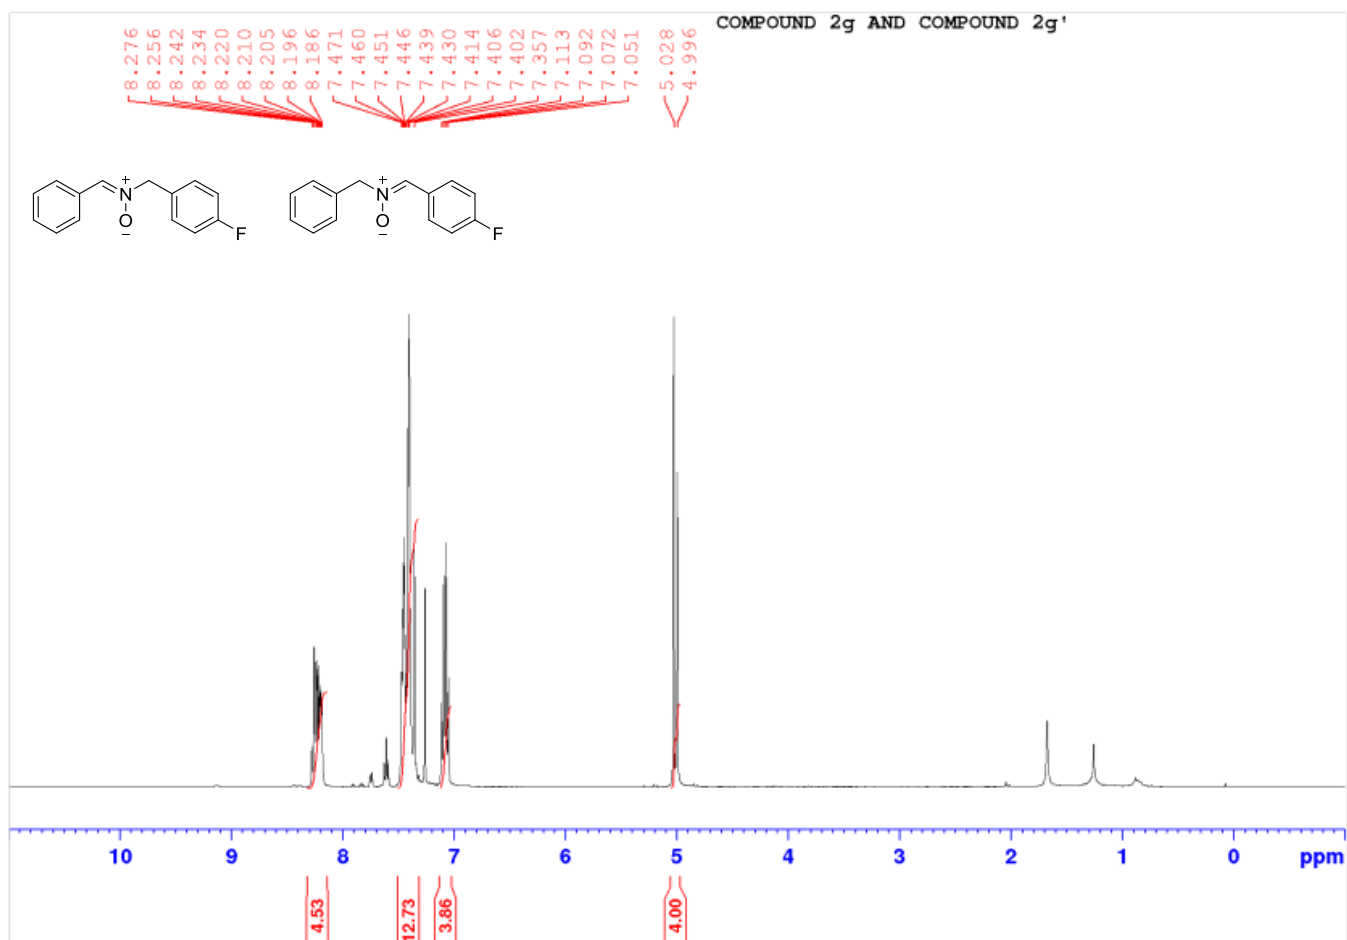

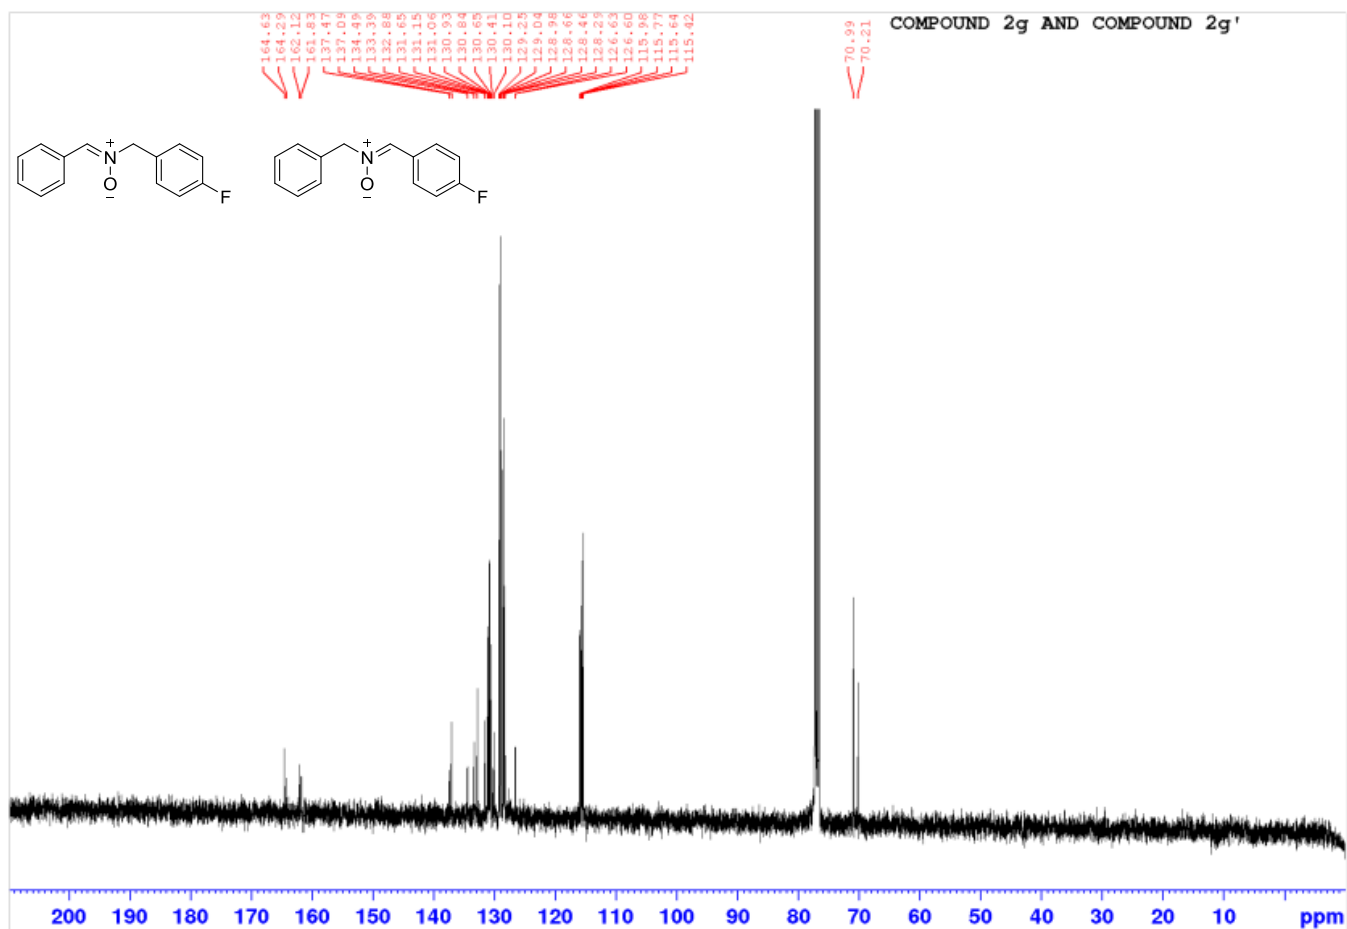

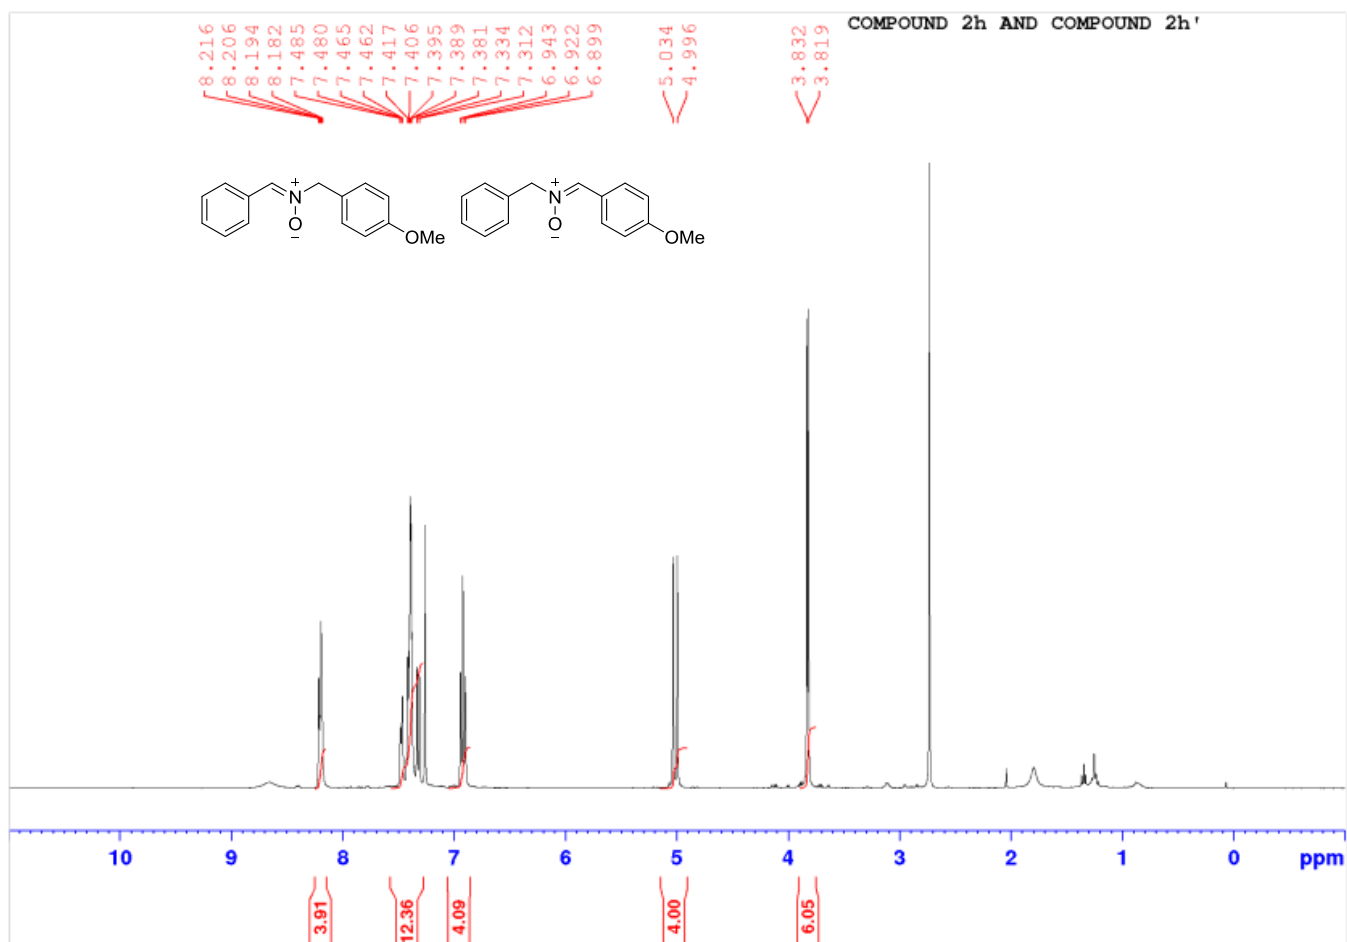





COMPOUND 2i

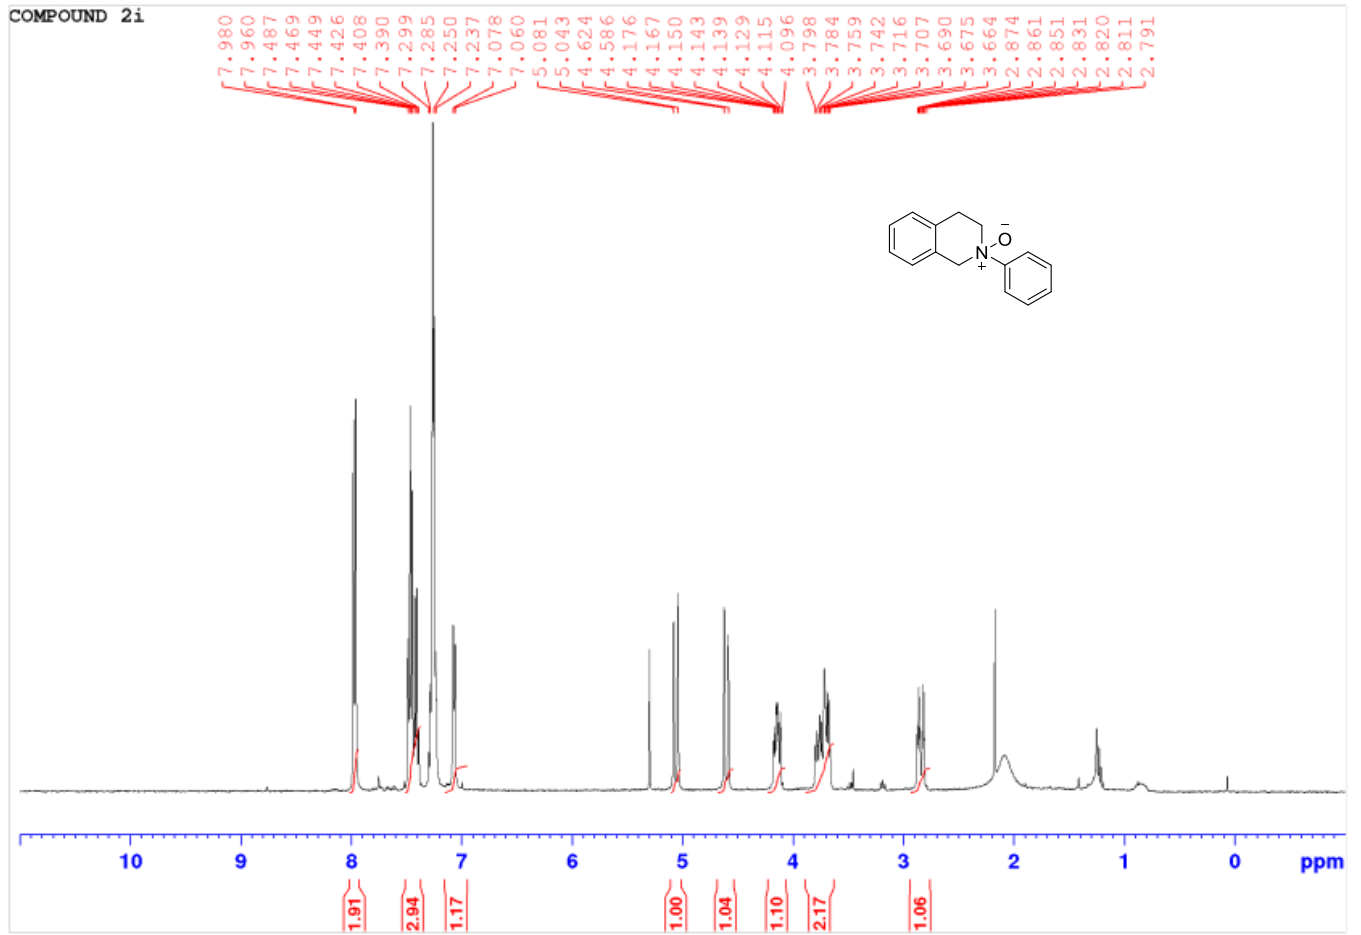

COMPOUND 2i

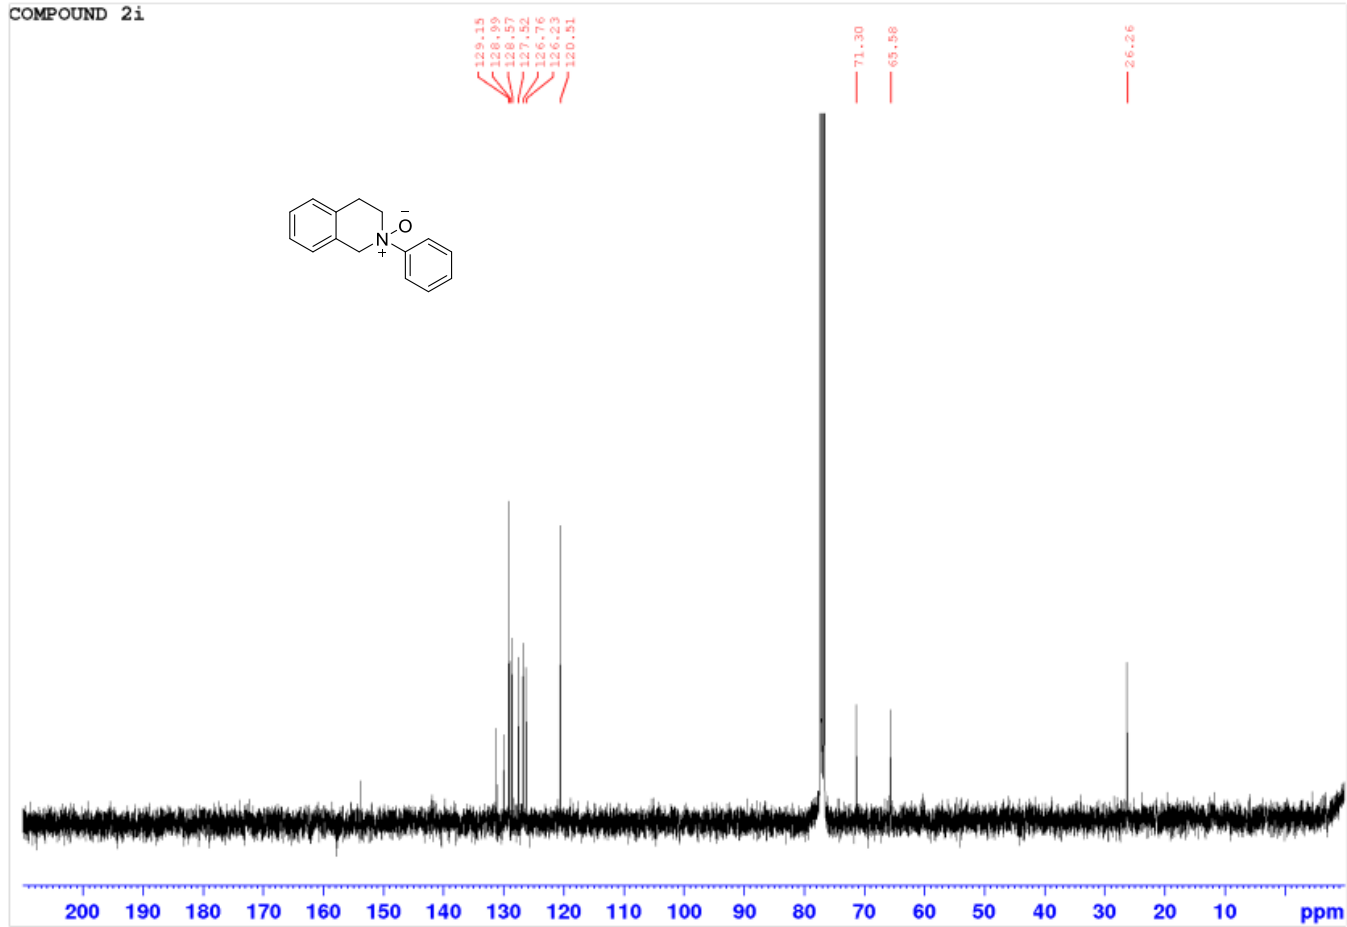

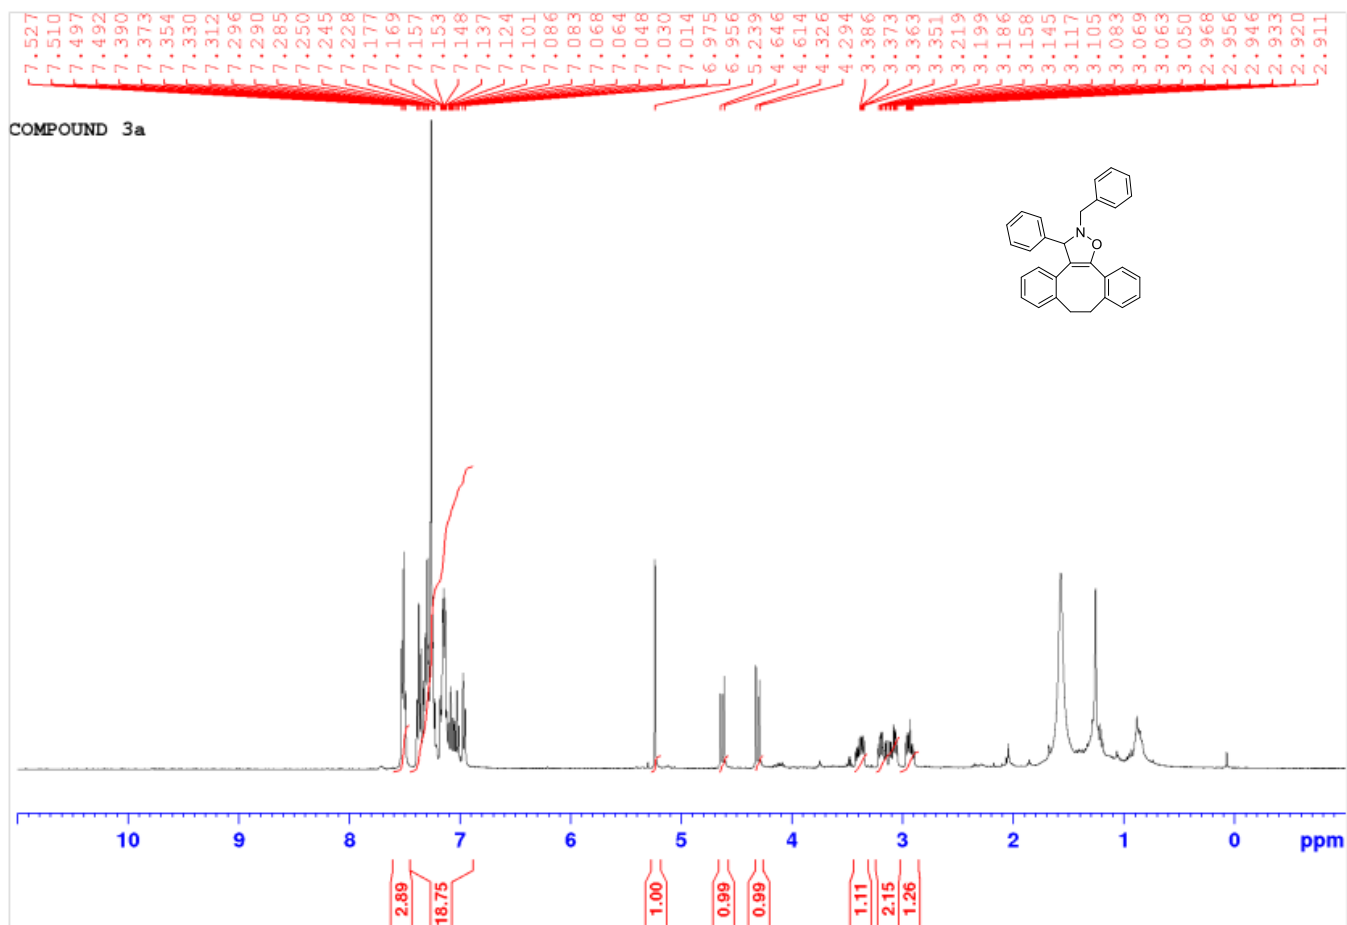

COMPOUND 3a

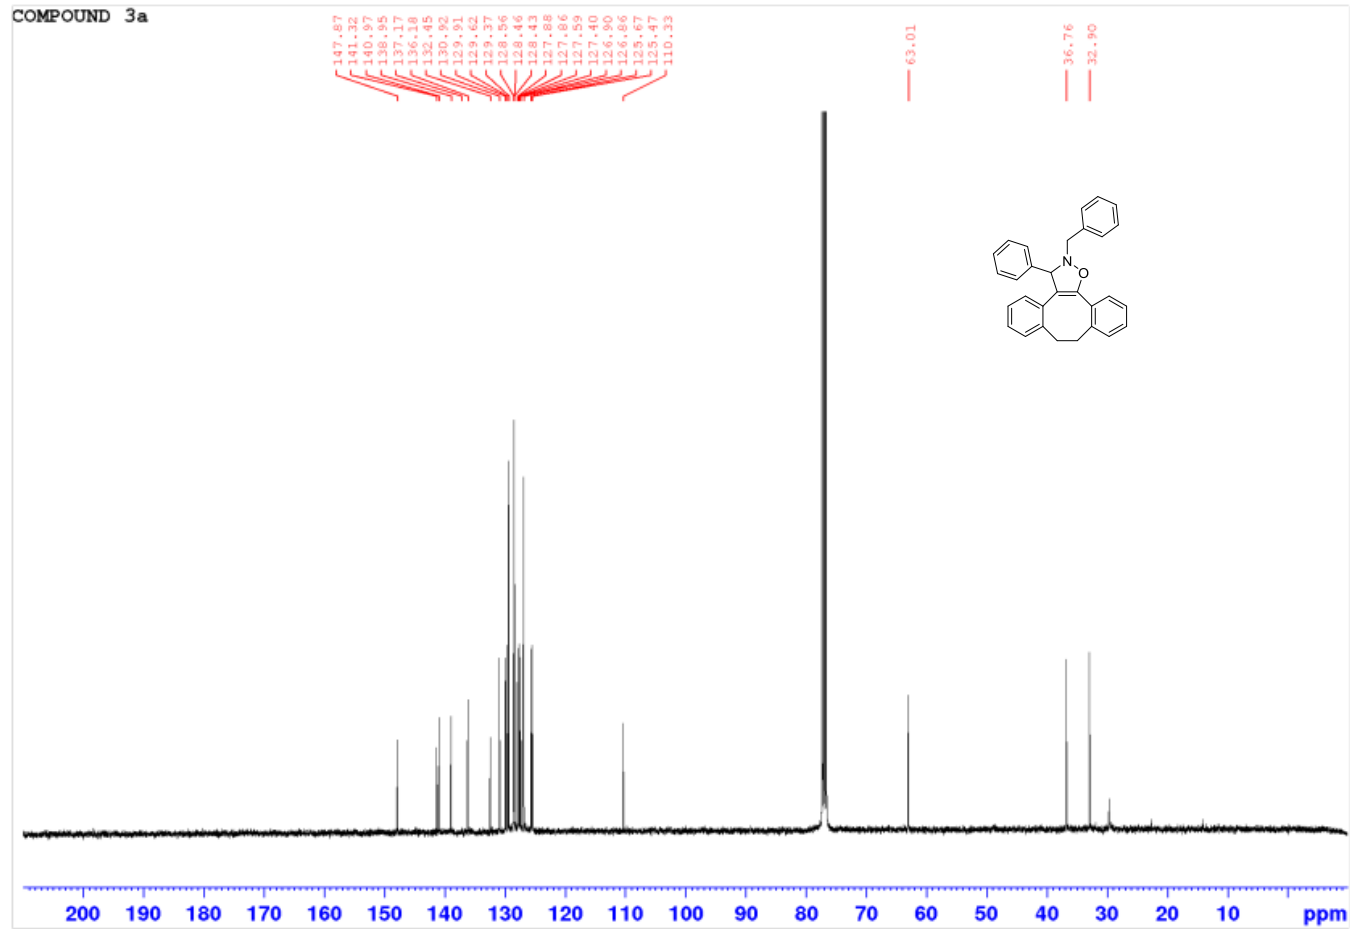

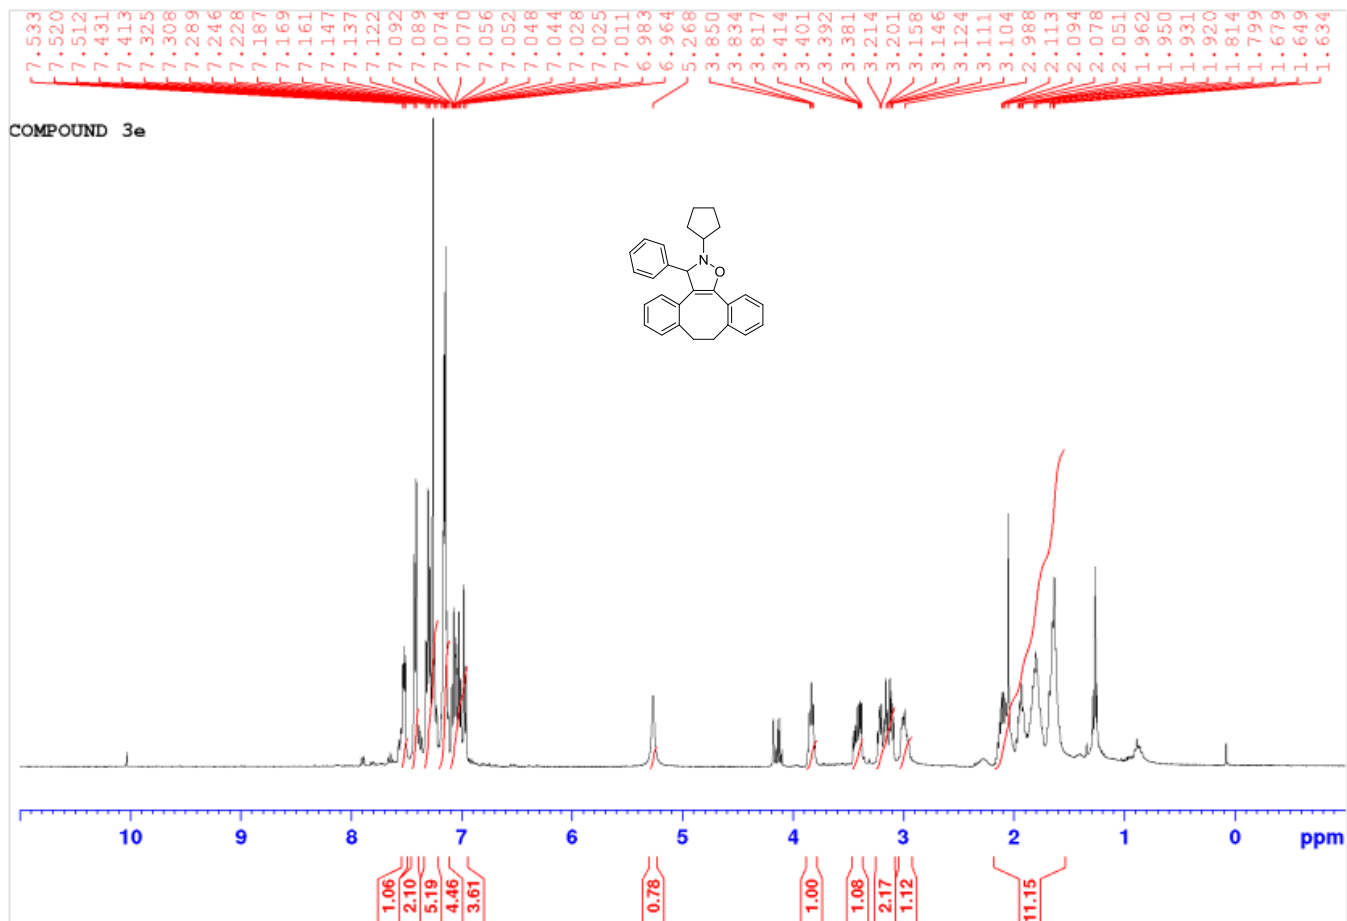

COMPOUND 3e

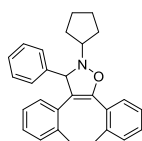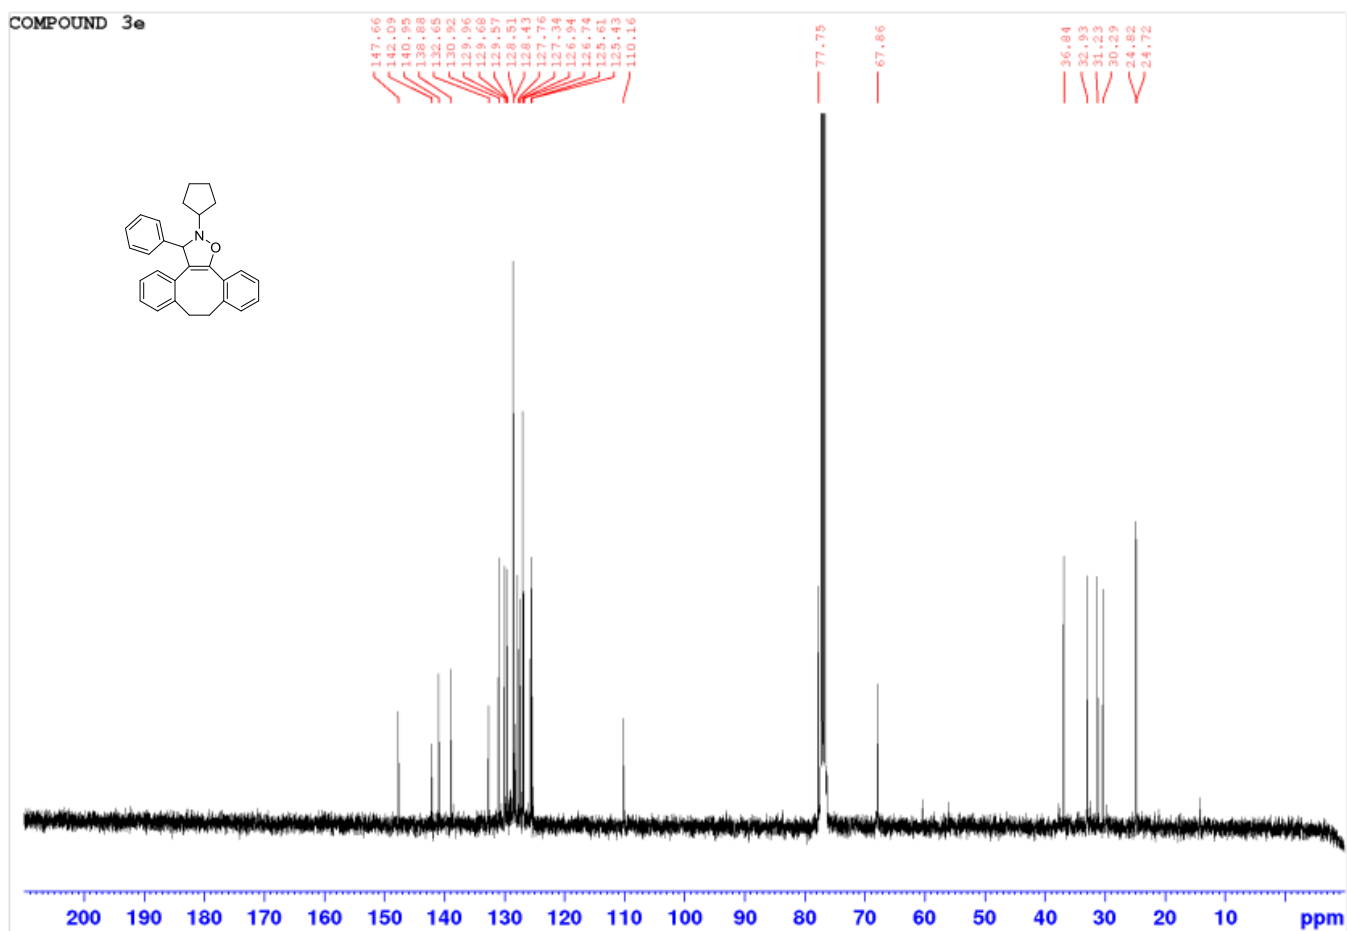

Supplement: c6ra18578a1.pdf [file c6ra18578a1.pdf]
